# Supplementary material for: Design, Synthesis and Anticancer Profile of New 4-(1H-benzo[d]imidazol-1-yl)pyrimidin-2-amine-Linked Sulfonamide Derivatives with V600EBRAF Inhibitory Effect
Source: MDPI journal article supplement (doi:10.3390/ijms221910491), 2021-09-28
Supplement: s1 [file s1]

# Design, Synthesis and Anticancer Profile of New 4-(1*H*-benzo[d]imidazol-1-yl)pyrimidin -2-amine Linked Sulfonamide Derivatives with V600EBRAF Inhibitory Effect

Mohammed S. Abdel-Maksoud<sup>1,†,\*</sup>, Ahmed A. B. Mohamed<sup>2,†</sup>, Rasha M. Hassan<sup>1</sup>, Mohamed A. Abdelgawad<sup>3</sup>, Garri Chilingaryan<sup>4</sup>, Samy Selim<sup>5</sup>, Mohamed S. Abdel-Bakky<sup>6</sup>, Mohammad M. Al-Sanea<sup>3,\*</sup>

<sup>1</sup> Medicinal &Pharmaceutical Chemistry Department, Pharmaceutical and Drug Industries Research Division, National Research Centre (NRC), (ID: 60014618), P.O. , Dokki, Giza 12622, Egypt, [ph\\_ss@hotmail.com](mailto:ph_ss@hotmail.com), [rashahassan\\_pharma@yahoo.ca](mailto:rashahassan_pharma@yahoo.ca)

<sup>2</sup> Department of Medicinal Chemistry, Faculty of Pharmacy, Mansoura University, Mansoura 35516, Egypt, [ahmed\\_smt@yahoo.com](mailto:ahmed_smt@yahoo.com)

<sup>3</sup> Department of Pharmaceutical Chemistry, College of Pharmacy, Jouf University, Sakaka, Aljouf 72341, Saudi Arabia, [mhmdgwd@ju.edu.sa](mailto:mhmdgwd@ju.edu.sa)

<sup>4</sup> Institute of Molecular Biology of NAS, Yerevan 0014, Armenia, [g\\_chilingaryan@mb.sci.am](mailto:g_chilingaryan@mb.sci.am)

<sup>5</sup> Department of Clinical Laboratory Sciences, College of Applied Medical Sciences, Jouf University, Sakaka, Aljouf 72341, Saudi Arabia, [sabdulsalam@ju.edu.sa](mailto:sabdulsalam@ju.edu.sa)

<sup>6</sup> Department of Pharmacology and Toxicology, College of Pharmacy, Qassim University, Qassim 51452 , Saudi Arabia, [m.abdelbakky@qu.edu.sa](mailto:m.abdelbakky@qu.edu.sa)

\* Correspondence: [mmalsanea@ju.edu.sa](mailto:mmalsanea@ju.edu.sa), [ms.abdel-maksoud@nrc.sci.eg](mailto:ms.abdel-maksoud@nrc.sci.eg)

† These authors are equally contributed to this work.

## Table of content

| Content                                                                                            | page    |
|----------------------------------------------------------------------------------------------------|---------|
| Title                                                                                              | 1s      |
| Table of content                                                                                   | 2s      |
| Figure 1s. Map heat analysis of target compounds <b>12a-g</b> over NCI 60 cell lines               | 3s      |
| Figure 2s. Map heat analysis of target compounds <b>12h-n</b> over NCI 60 cell lines               | 4s      |
| Table 1s : Percent growth over 60 cell lines for ethyl linker containing derivatives <b>12a-g</b>  | 5s-6s   |
| Table 2s : Percent growth over 60 cell lines for propyl linker containing derivatives <b>12h-n</b> | 7s-8s   |
| NCI data                                                                                           | 9s-22s  |
| Spectral data                                                                                      | 23s-49s |
| NCI standard procedure for 60 cell lines assay                                                     | 50s     |

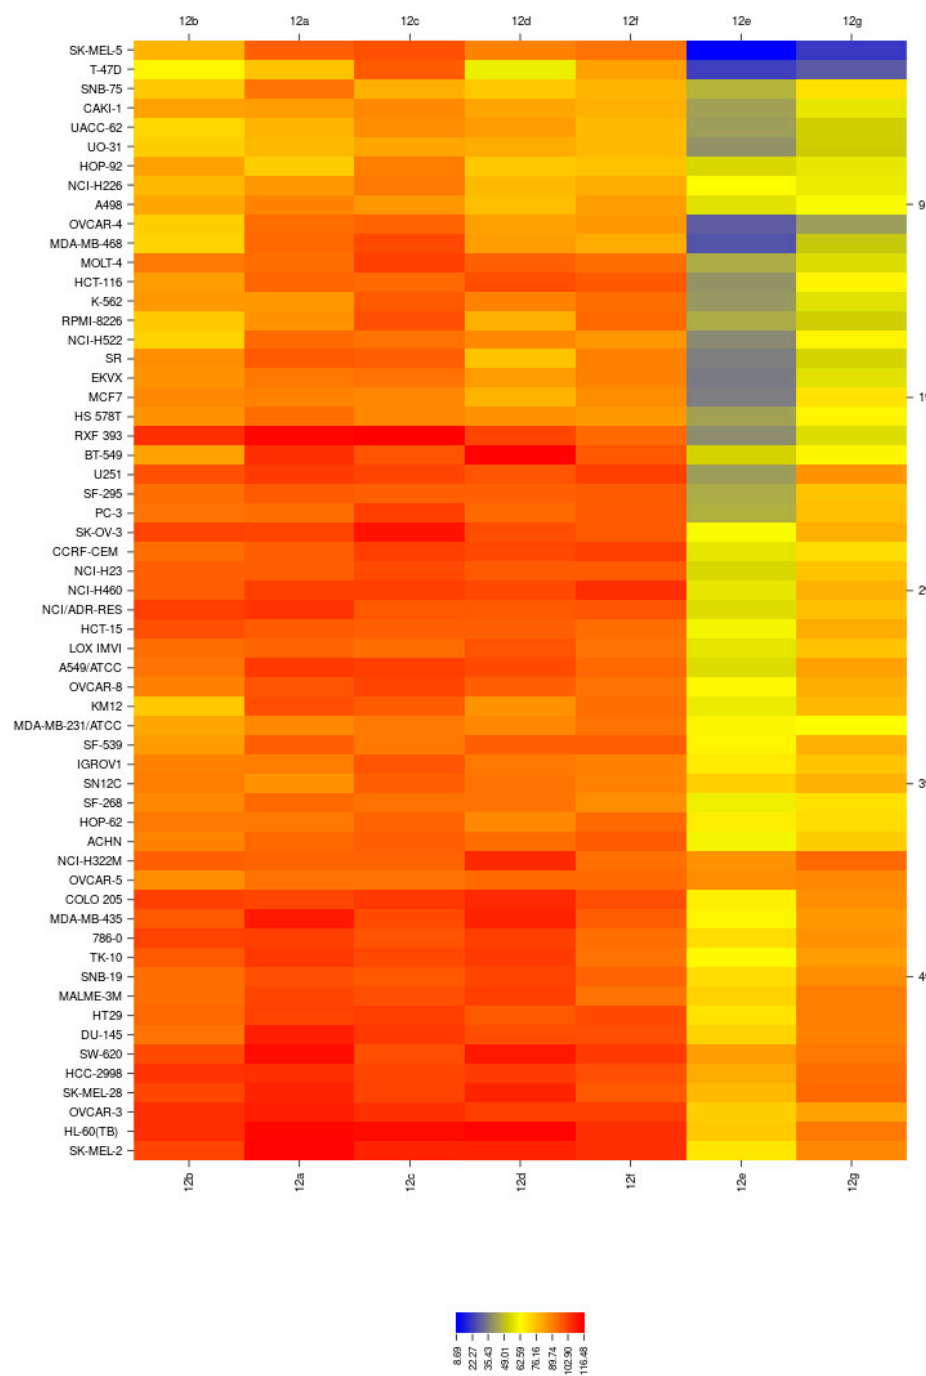

Figure 1s. Map heat analysis of target compounds **12a-g** over NCI 60 cell lines.

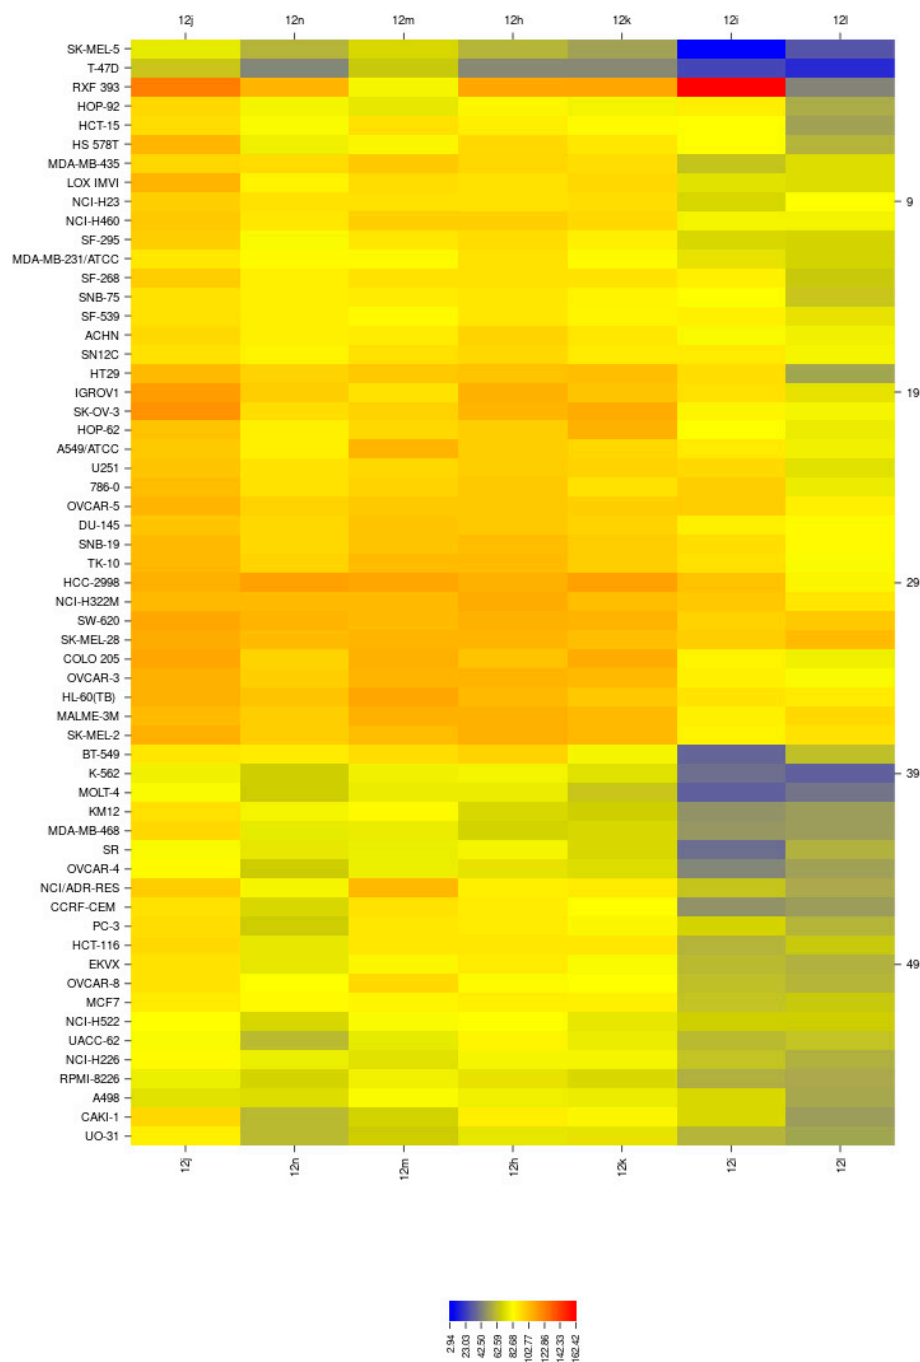

Figure 2s. Map heat analysis of target compounds **12h-n** over NCI 60 cell lines.

Table 1s : Percent growth over 60 cell lines for ethyl linker containing derivatives **12a-g**.

| <b>Subpanel</b>                       | <b>12a</b> | <b>12b</b> | <b>12c</b> | <b>12d</b> | <b>12e</b> | <b>12f</b> | <b>12g</b>   |
|---------------------------------------|------------|------------|------------|------------|------------|------------|--------------|
| <b>Leukemia</b>                       |            |            |            |            |            |            |              |
| CCRF-CEM                              | 96.04      | 93.45      | 102.97     | 100.92     | 57.64      | 102.48     | 69.49        |
| HL-60(TB)                             | 112.89     | 106.15     | 112.54     | 114.36     | 73.82      | 105.97     | 91.22        |
| K-562                                 | 84.78      | 84.05      | 97.63      | 88.40      | 40.82      | 92.95      | <b>56.14</b> |
| MOLT-4                                | 93.72      | 90.46      | 102.61     | 95.86      | 45.17      | 93.29      | <b>55.29</b> |
| RPMI-8226                             | 84.93      | 73.62      | 99.40      | 79.75      | 44.94      | 94.04      | 52.51        |
| SR                                    | 97.54      | 85.84      | 96.34      | 75.08      | 35.52      | 89.16      | 53.63        |
| <b>Non-Small<br/>Cell Lung Cancer</b> |            |            |            |            |            |            |              |
| A549/ATCC                             | 103.72     | 91.26      | 102.78     | 100.15     | 55.43      | 94.62      | 82.36        |
| EKVX                                  | 91.22      | 85.24      | 92.22      | 83.36      | 34.69      | 89.19      | 56.10        |
| HOP-62                                | 90.71      | 90.88      | 95.36      | 87.17      | 66.07      | 94.60      | 69.62        |
| HOP-92                                | 73.31      | 82.27      | 90.16      | 74.24      | 54.55      | 75.40      | 57.86        |
| NCI-H226                              | 84.57      | 77.55      | 91.12      | 76.53      | 62.71      | 80.60      | 58.69        |
| NCI-H23                               | 96.41      | 95.81      | 100.70     | 97.30      | 54.55      | 96.92      | 74.63        |
| NCI-H322M                             | 94.88      | 95.62      | 95.27      | 107.00     | 85.30      | 92.58      | 94.38        |
| NCI-H460                              | 102.66     | 96.29      | 102.89     | 100.58     | 57.80      | 106.11     | 79.00        |
| NCI-H522                              | 93.85      | 71.82      | 92.11      | 87.18      | 38.17      | 84.44      | 64.56        |
| <b>Colon Cancer</b>                   |            |            |            |            |            |            |              |
| COLO 205                              | 101.30     | 102.41     | 104.07     | 107.01     | 64.92      | 99.76      | 86.83        |
| HCC-2998                              | 105.81     | 104.40     | 101.21     | 103.48     | 80.46      | 99.72      | 93.09        |
| HCT-116                               | 94.63      | 83.58      | 94.61      | 99.76      | 40.08      | 97.98      | 64.09        |
| HCT-15                                | 97.00      | 100.06     | 96.64      | 95.73      | 60.72      | 93.72      | 80.22        |
| HT29                                  | 101.92     | 94.36      | 102.72     | 97.17      | 68.00      | 100.15     | 90.15        |
| KM12                                  | 99.99      | 73.43      | 97.07      | 85.44      | 58.72      | 93.20      | 77.40        |
| SW-620                                | 112.27     | 100.16     | 100.05     | 110.11     | 83.49      | 103.20     | 90.84        |
| <b>CNS-Cancer</b>                     |            |            |            |            |            |            |              |
| SF-268                                | 94.07      | 88.19      | 92.34      | 91.24      | 59.50      | 86.72      | 68.77        |
| SF-295                                | 97.28      | 93.57      | 96.65      | 96.48      | 44.68      | 96.98      | 75.49        |
| SF-539                                | 96.07      | 83.72      | 91.15      | 96.18      | 64.84      | 96.17      | 79.68        |
| SNB-19                                | 99.64      | 92.97      | 97.72      | 101.26     | 69.76      | 95.30      | 86.81        |
| SNB-75                                | 91.75      | 73.63      | 79.37      | 74.11      | 46.77      | 78.79      | 68.99        |
| U251                                  | 103.34     | 99.55      | 101.61     | 98.60      | 42.41      | 102.85     | 85.15        |
| <b>Melanoma</b>                       |            |            |            |            |            |            |              |
| LOX IMVI                              | 95.05      | 93.25      | 93.49      | 99.07      | 57.44      | 91.67      | 75.18        |
| MALME-3M                              | 101.04     | 93.70      | 99.54      | 102.82     | 71.37      | 91.72      | 90.24        |
| M14                                   | ---        | ---        |            |            |            |            |              |
| MDA-MB-435                            | 109.49     | 97.74      | 100.22     | 108.45     | 64.37      | 96.62      | 84.11        |
| SK-MEL-2                              | 114.98     | 101.47     | 108.54     | 107.85     | 67.76      | 105.98     | 87.74        |
| SK-MEL-28                             | 108.05     | 101.20     | 101.46     | 108.16     | 77.19      | 97.92      | 94.43        |

|                        |        |        |        |        |       |        |       |
|------------------------|--------|--------|--------|--------|-------|--------|-------|
| SK-MEL-5               | 95.82  | 78.02  | 99.44  | 89.14  | 8.48  | 92.21  | 20.80 |
| UACC-62                | 78.31  | 71.28  | 86.37  | 82.77  | 42.41 | 76.59  | 53.03 |
| <b>Ovarian Cancer</b>  |        |        |        |        |       |        |       |
| IGROV1                 | 89.88  | 89.26  | 98.20  | 90.72  | 66.39 | 88.99  | 75.18 |
| OVCAR-3                | 108.63 | 106.17 | 105.65 | 102.75 | 72.90 | 102.87 | 82.02 |
| OVCAR-4                | 93.41  | 72.29  | 95.25  | 82.22  | 28.42 | 84.28  | 42.15 |
| OVCAR-5                | 92.49  | 86.58  | 91.71  | 93.95  | 86.24 | 93.88  | 87.83 |
| OVCAR-8                | 98.02  | 89.01  | 101.55 | 95.60  | 63.50 | 91.47  | 79.83 |
| NCI/ADR-RES            | 104.47 | 102.88 | 97.81  | 97.63  | 55.91 | 98.74  | 75.74 |
| SK-OV-3                | 101.19 | 102.17 | 111.56 | 99.94  | 62.23 | 97.45  | 79.46 |
| <b>Renal Cancer</b>    |        |        |        |        |       |        |       |
| 786-0                  | 102.76 | 102.21 | 98.98  | 102.91 | 69.65 | 92.97  | 85.41 |
| A498                   | 88.60  | 80.70  | 84.78  | 76.27  | 56.61 | 82.86  | 62.06 |
| ACHN                   | 94.21  | 88.29  | 96.40  | 93.63  | 60.80 | 97.14  | 72.98 |
| CAKI-1                 | 83.72  | 82.01  | 87.40  | 81.55  | 43.10 | 79.60  | 57.53 |
| RXF 393                | 113.30 | 105.90 | 116.69 | 100.99 | 38.25 | 94.57  | 55.39 |
| SN12C                  | 85.07  | 89.69  | 96.64  | 91.48  | 72.54 | 88.51  | 79.03 |
| TK-10                  | 104.20 | 97.82  | 100.85 | 103.12 | 63.40 | 92.50  | 83.69 |
| UO-31                  | 77.03  | 72.63  | 81.59  | 79.80  | 39.85 | 77.26  | 52.03 |
| <b>Prostate Cancer</b> |        |        |        |        |       |        |       |
| PC-3                   | 93.53  | 91.34  | 103.00 | 93.82  | 45.46 | 97.53  | 76.11 |
| DU-145                 | 109.21 | 91.55  | 103.71 | 99.93  | 71.82 | 99.91  | 89.27 |
| <b>Breast Cancer</b>   |        |        |        |        |       |        |       |
| MCF7                   | 89.32  | 87.73  | 87.90  | 78.37  | 34.88 | 86.18  | 67.90 |
| MDA-MB-231/ATCC        | 87.62  | 81.83  | 90.55  | 88.16  | 63.96 | 92.06  | 62.50 |
| HS 578T                | 93.50  | 85.50  | 88.06  | 85.69  | 42.89 | 84.13  | 64.25 |
| BT-549                 | 105.93 | 82.22  | 99.29  | 115.11 | 53.06 | 97.83  | 63.69 |
| T-47D                  | 75.44  | 64.38  | 97.07  | 59.10  | 22.34 | 82.35  | 27.62 |
| MDA-MB-468             | 94.32  | 71.64  | 100.93 | 83.97  | 26.45 | 80.31  | 51.01 |

Table 2s : Percent growth over 60 cell lines for propyl linker containing derivatives **12h-n**.

| <b>Subpanel</b>                   | <b>12h</b> | <b>12i</b> | <b>12j</b> | <b>12k</b> | <b>12l</b>   | <b>12m</b> | <b>12n</b> |
|-----------------------------------|------------|------------|------------|------------|--------------|------------|------------|
| <b>Leukemia</b>                   |            |            |            |            |              |            |            |
| CCRF-CEM                          | 88.06      | 49.05      | 91.68      | 82.97      | 51.91        | 91.38      | 70.87      |
| HL-60(TB)                         | 103.91     | 90.93      | 107.79     | 99.78      | 88.98        | 110.13     | 101.05     |
| K-562                             | 79.55      | 37.18      | 79.17      | 73.55      | 33.90        | 78.84      | 67.62      |
| MOLT-4                            | 77.22      | 33.16      | 82.28      | 64.91      | 38.42        | 77.01      | 67.04      |
| RPMI-8226                         | 74.26      | 57.75      | 77.95      | 71.08      | <b>55.65</b> | 78.61      | 69.69      |
| SR                                | 80.03      | 36.82      | 81.45      | 70.79      | 57.99        | 77.57      | 75.38      |
| <b>Non-Small Cell Lung Cancer</b> |            |            |            |            |              |            |            |
| A549/ATCC                         | 97.60      | 88.76      | 98.98      | 95.00      | 79.03        | 105.62     | 86.28      |
| EKVX                              | 88.88      | 61.18      | 91.04      | 81.48      | 58.10        | 84.42      | 75.09      |
| HOP-62                            | 96.87      | 82.72      | 101.27     | 106.86     | 77.31        | 94.85      | 87.09      |
| HOP-92                            | 84.78      | 87.91      | 94.63      | 79.35      | 56.05        | 75.78      | 80.25      |
| NCI-H226                          | 81.00      | 64.08      | 83.15      | 80.23      | 57.62        | 73.24      | 77.83      |
| NCI-H23                           | 91.78      | 70.37      | 97.13      | 92.80      | 82.49        | 91.87      | 91.28      |
| NCI-H322M                         | 109.00     | 99.49      | 104.29     | 102.68     | 89.91        | 103.58     | 103.09     |
| NCI-H460                          | 96.92      | 79.74      | 99.81      | 94.28      | 79.34        | 97.26      | 89.78      |
| NCI-H522                          | 82.70      | 68.48      | 82.85      | 75.53      | 66.91        | 81.12      | 69.98      |
| <b>Colon Cancer</b>               |            |            |            |            |              |            |            |
| COLO 205                          | 101.58     | 85.98      | 109.53     | 108.12     | 78.15        | 108.02     | 96.44      |
| HCC-2998                          | 106.99     | 101.61     | 107.72     | 111.93     | 84.77        | 110.54     | 112.12     |
| HCT-116                           | 90.34      | 58.74      | 94.09      | 90.27      | 65.62        | 89.90      | 75.93      |
| HCT-15                            | 88.01      | 82.79      | 93.09      | 83.21      | 53.81        | 92.30      | 81.82      |
| HT29                              | 101.35     | 92.78      | 103.76     | 102.98     | 54.62        | 99.65      | 96.35      |
| KM12                              | 71.05      | 48.89      | 92.00      | 68.35      | 51.71        | 84.14      | 79.77      |
| SW-620                            | 107.02     | 96.22      | 109.97     | 106.09     | 99.55        | 103.53     | 106.07     |
| <b>CNS-Cancer</b>                 |            |            |            |            |              |            |            |
| SF-268                            | 91.65      | 86.29      | 98.16      | 91.15      | 66.50        | 91.56      | 86.80      |
| SF-295                            | 92.52      | 70.60      | 97.78      | 86.50      | 69.77        | 90.48      | 81.21      |
| SF-539                            | 89.39      | 86.21      | 91.91      | 85.21      | 74.49        | 83.89      | 87.89      |
| SNB-19                            | 102.61     | 92.59      | 104.34     | 98.60      | 83.40        | 100.20     | 94.18      |
| SNB-75                            | 89.74      | 82.47      | 91.68      | 86.13      | 65.16        | 88.25      | 87.22      |
| U251                              | 98.23      | 93.81      | 100.44     | 96.63      | 73.24        | 94.46      | 90.80      |
| <b>Melanoma</b>                   |            |            |            |            |              |            |            |
| LOX IMVI                          | 91.67      | 73.96      | 106.81     | 94.57      | 72.31        | 93.42      | 85.60      |
| MALME-3M                          | 108.04     | 86.14      | 103.48     | 103.93     | 93.97        | 107.43     | 98.38      |
| M14                               | ----       |            |            | ----       |              |            |            |
| MDA-MB-435                        | 95.45      | 64.60      | 95.52      | 92.62      | 72.11        | 98.74      | 93.44      |
| SK-MEL-2                          | 108.06     | 85.79      | 107.85     | 104.58     | 90.97        | 102.77     | 97.77      |
| SK-MEL-28                         | 105.29     | 97.89      | 108.17     | 102.23     | 103.40       | 105.97     | 103.48     |

|                        |        |        |        |        |       |        |        |
|------------------------|--------|--------|--------|--------|-------|--------|--------|
| SK-MEL-5               | 60.20  | 2.63   | 76.22  | 53.55  | 29.94 | 70.07  | 58.77  |
| UACC-62                | 84.97  | 61.64  | 81.50  | 77.32  | 64.07 | 76.28  | 62.04  |
| <b>Ovarian Cancer</b>  |        |        |        |        |       |        |        |
| IGROV1                 | 107.03 | 91.83  | 113.55 | 100.84 | 74.32 | 91.45  | 98.12  |
| OVCAR-3                | 106.06 | 86.71  | 107.13 | 103.88 | 81.22 | 105.16 | 96.81  |
| OVCAR-4                | 74.54  | 44.16  | 83.02  | 72.06  | 52.99 | 77.41  | 66.70  |
| OVCAR-5                | 99.08  | 98.59  | 105.12 | 96.97  | 87.18 | 99.62  | 96.26  |
| OVCAR-8                | 84.04  | 62.47  | 90.84  | 82.52  | 59.98 | 93.70  | 82.48  |
| NCI/ADR-RES            | 86.15  | 64.29  | 98.20  | 88.94  | 55.80 | 104.95 | 81.06  |
| SK-OV-3                | 105.26 | 85.15  | 116.51 | 109.27 | 80.27 | 96.21  | 92.51  |
| <b>Renal Cancer</b>    |        |        |        |        |       |        |        |
| 786-0                  | 98.81  | 97.67  | 102.56 | 91.74  | 77.21 | 95.93  | 91.18  |
| A498                   | 78.36  | 70.55  | 72.97  | 77.20  | 55.33 | 81.92  | 72.14  |
| ACHN                   | 95.68  | 81.15  | 94.14  | 90.38  | 79.00 | 88.24  | 87.13  |
| CAKI-1                 | 87.44  | 70.98  | 94.49  | 84.50  | 51.38 | 68.84  | 60.51  |
| RXF 393                | 109.91 | 162.73 | 123.79 | 110.60 | 43.81 | 80.63  | 105.26 |
| SN12C                  | 94.31  | 89.05  | 91.70  | 89.16  | 80.46 | 92.41  | 85.91  |
| TK-10                  | 103.41 | 91.94  | 104.35 | 97.80  | 81.52 | 103.37 | 95.71  |
| UO-31                  | 75.30  | 59.28  | 87.20  | 74.26  | 54.43 | 67.17  | 60.73  |
| <b>Prostate Cancer</b> |        |        |        |        |       |        |        |
| PC-3                   | 89.19  | 69.28  | 92.47  | 84.69  | 58.99 | 89.71  | 66.68  |
| DU-145                 | 99.24  | 87.19  | 100.10 | 96.50  | 83.52 | 100.29 | 94.49  |
| <b>Breast Cancer</b>   |        |        |        |        |       |        |        |
| MCF7                   | 87.73  | 63.70  | 89.04  | 86.67  | 65.52 | 85.07  | 83.44  |
| MDA-MB-231/ATCC        | 92.40  | 74.42  | 89.36  | 83.63  | 68.70 | 84.11  | 83.09  |
| HS 578T                | 93.67  | 82.38  | 105.05 | 89.95  | 58.63 | 84.77  | 78.28  |
| BT-549                 | 96.55  | 34.91  | 90.08  | 80.80  | 62.86 | 92.92  | 88.17  |
| T-47D                  | 45.80  | 25.46  | 65.26  | 45.29  | 16.78 | 66.31  | 44.68  |
| MDA-MB-468             | 68.82  | 50.23  | 93.79  | 70.73  | 52.69 | 77.17  | 76.17  |

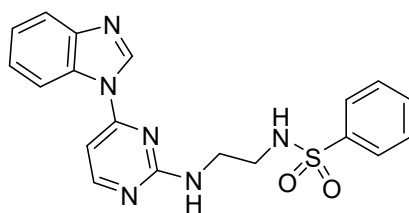

12a

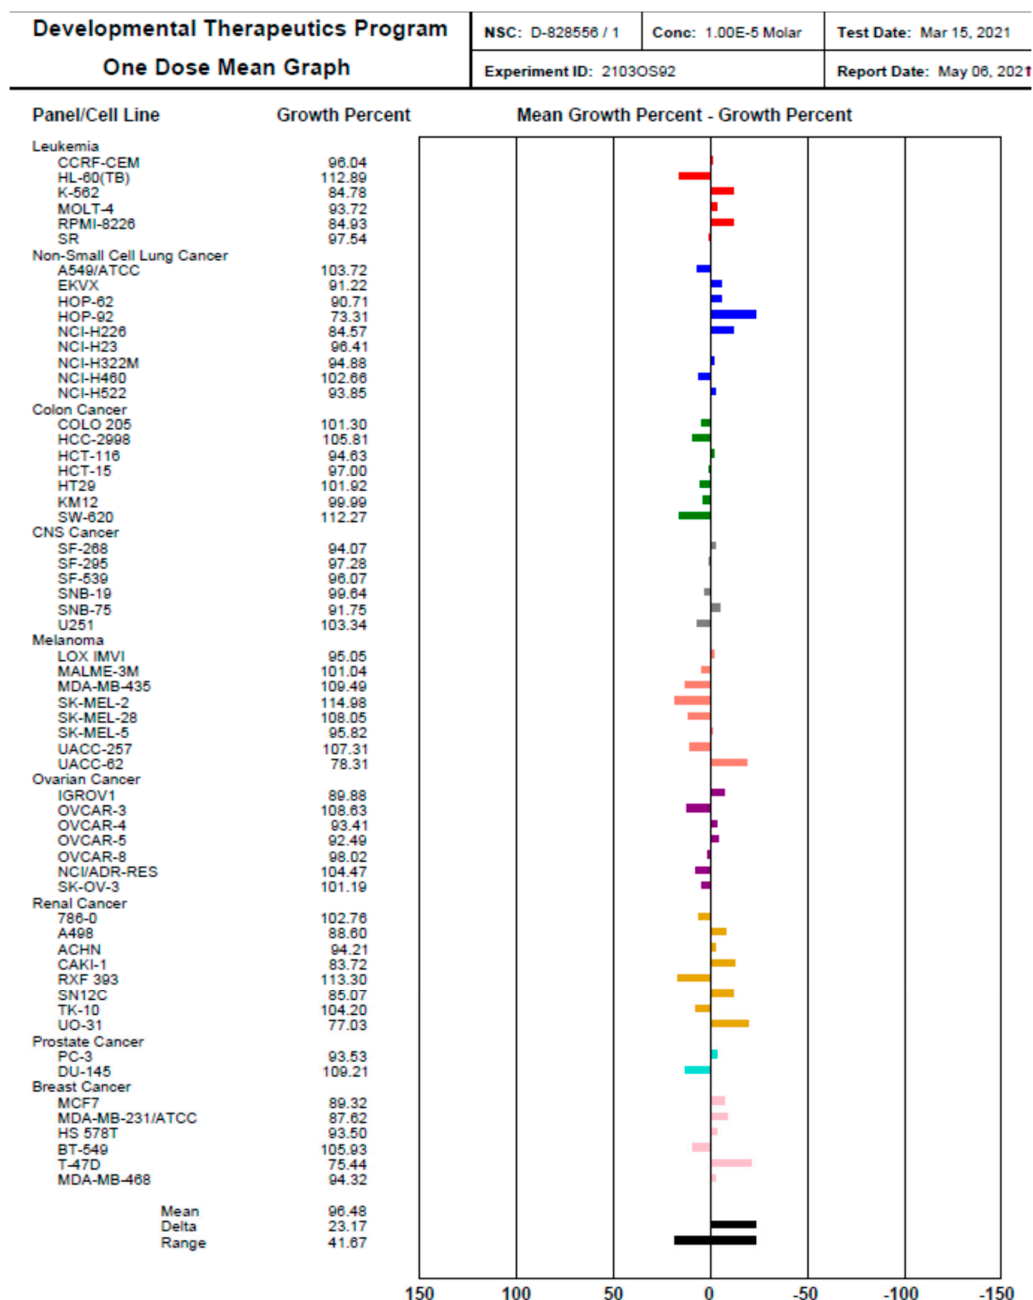

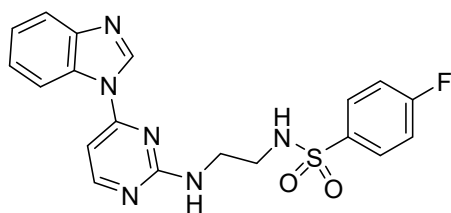

12b

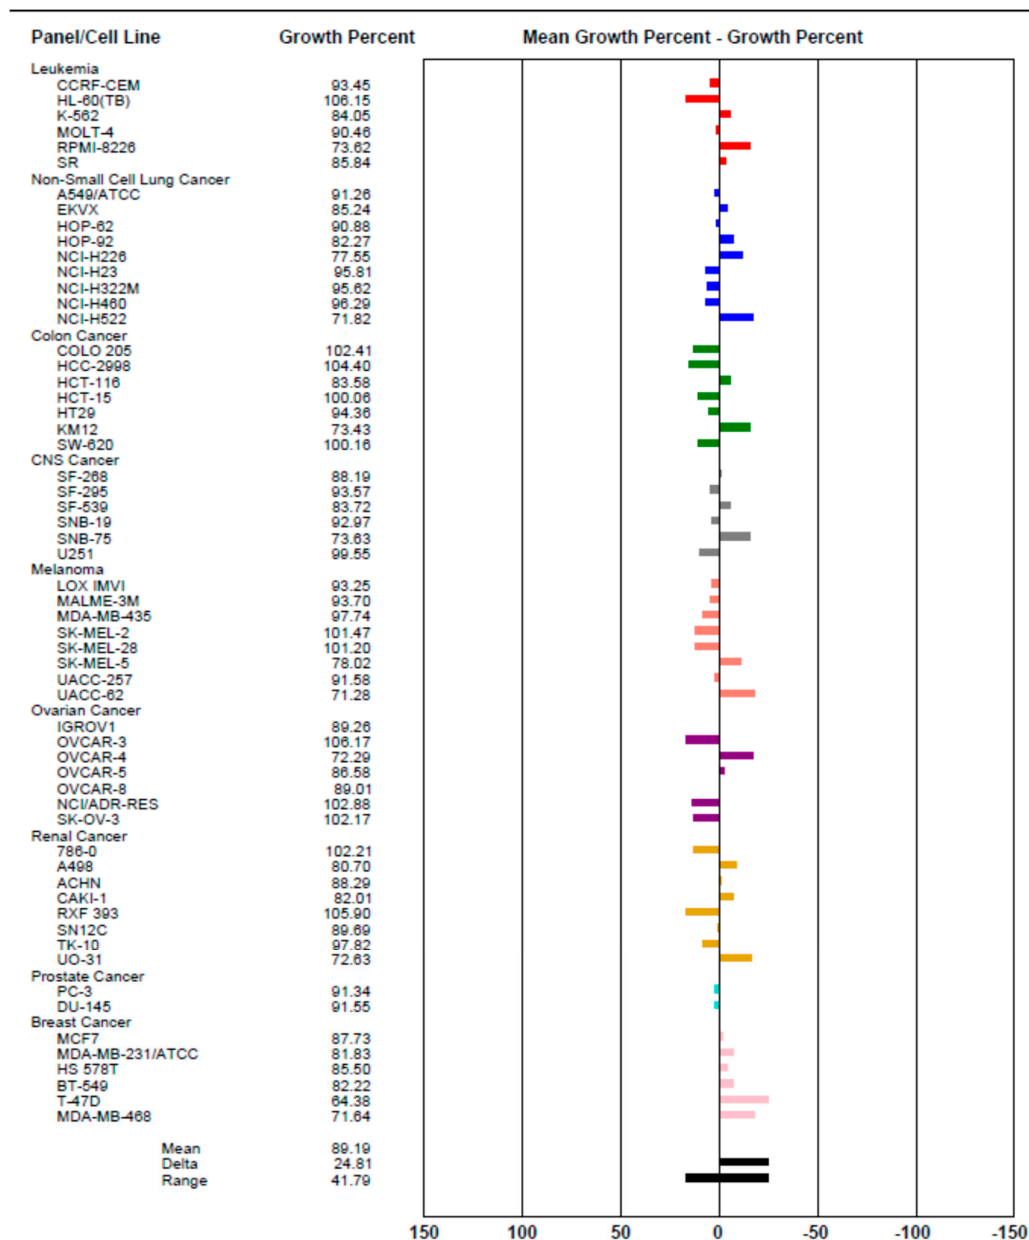

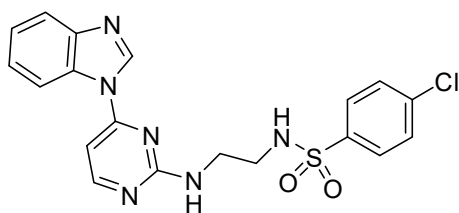

12c

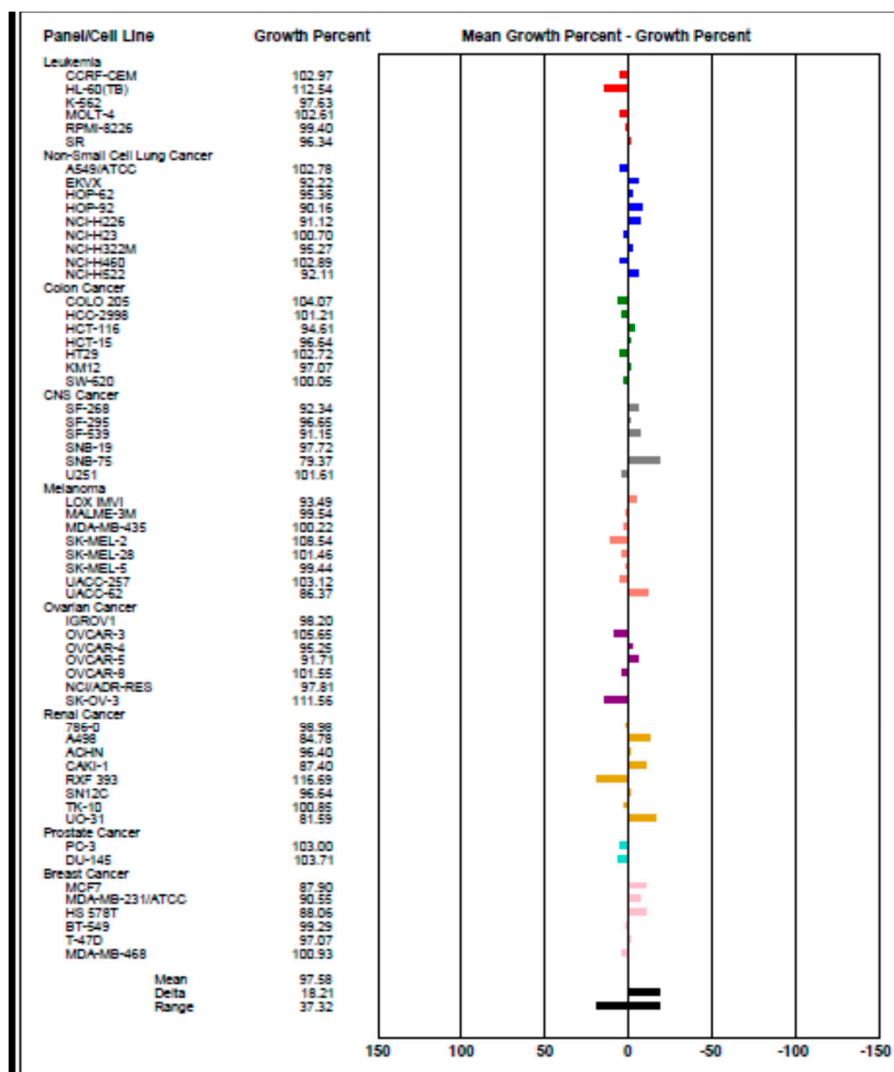

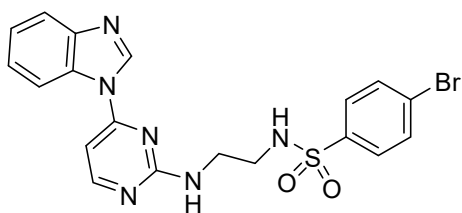

12d

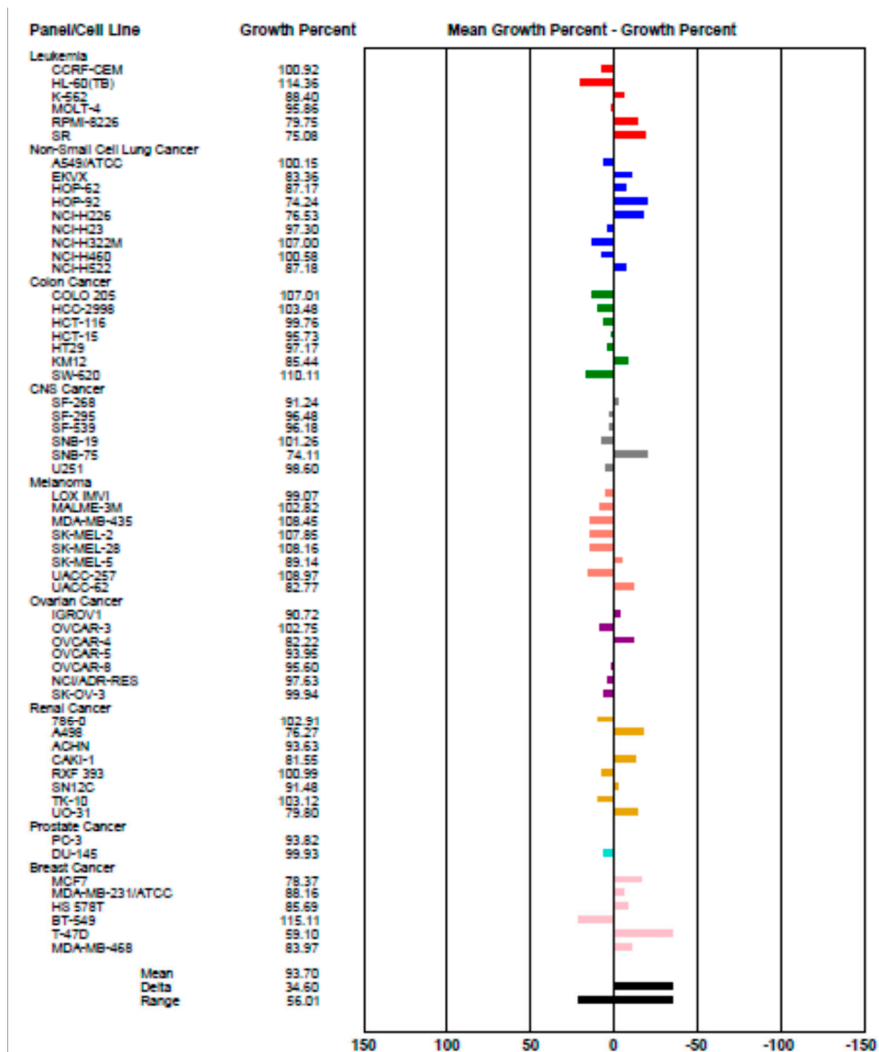

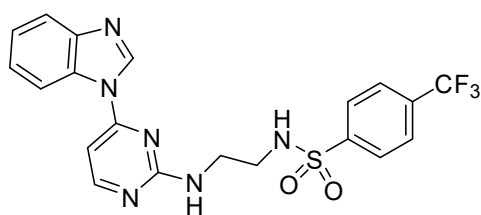

12e

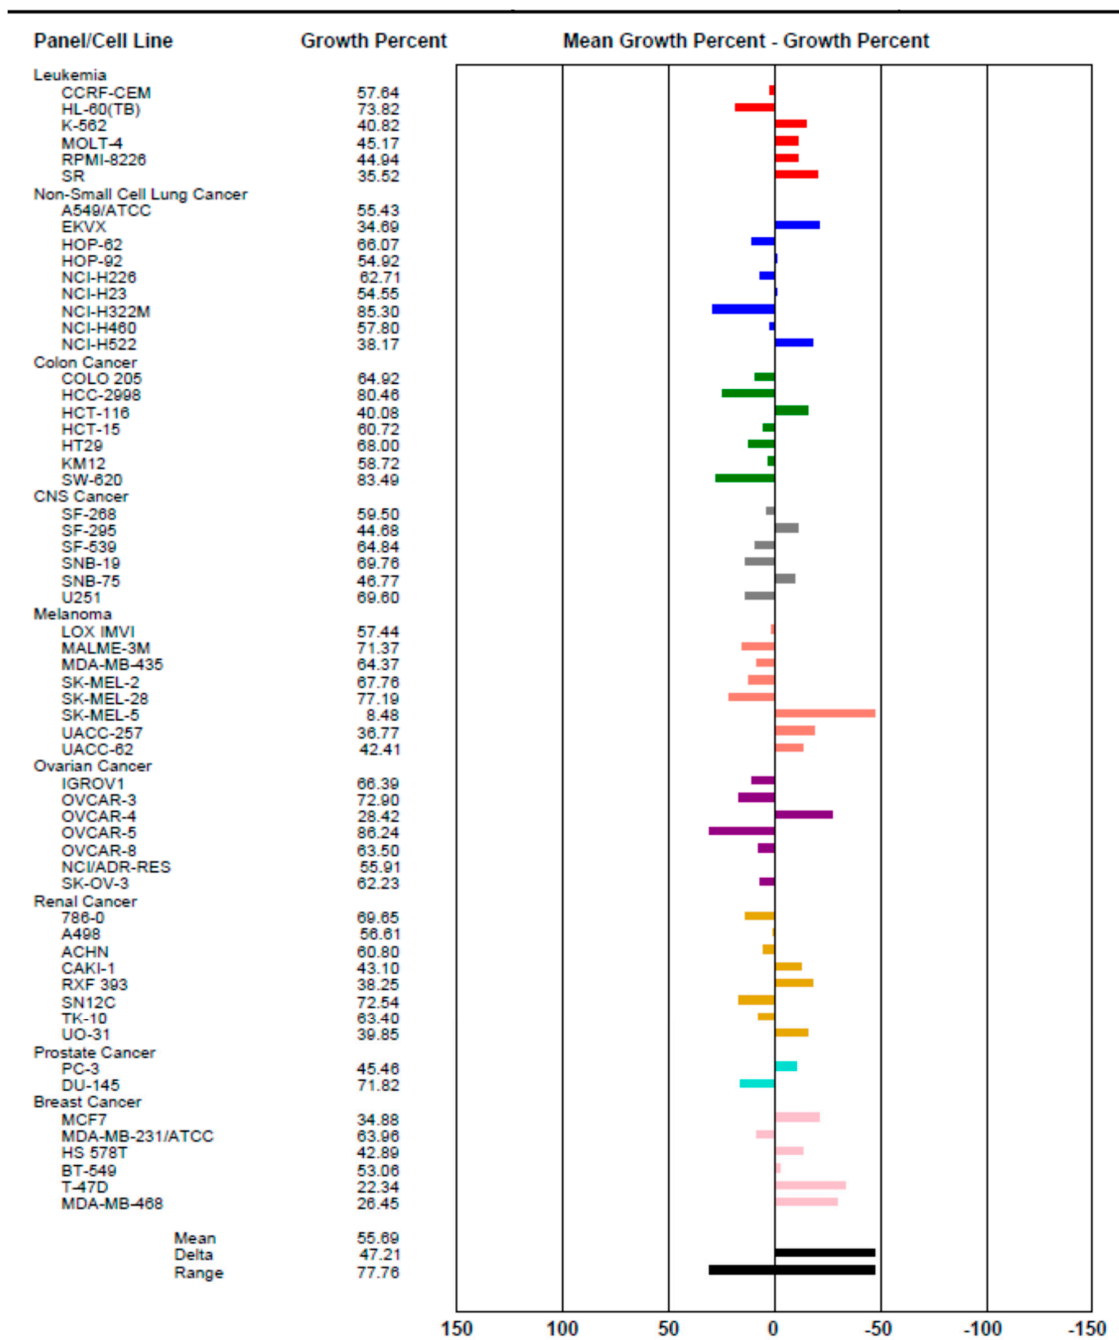

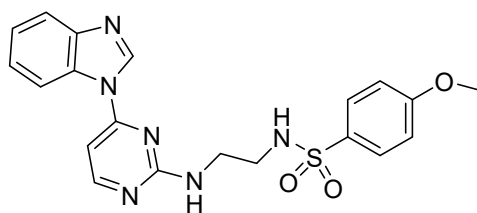

12f

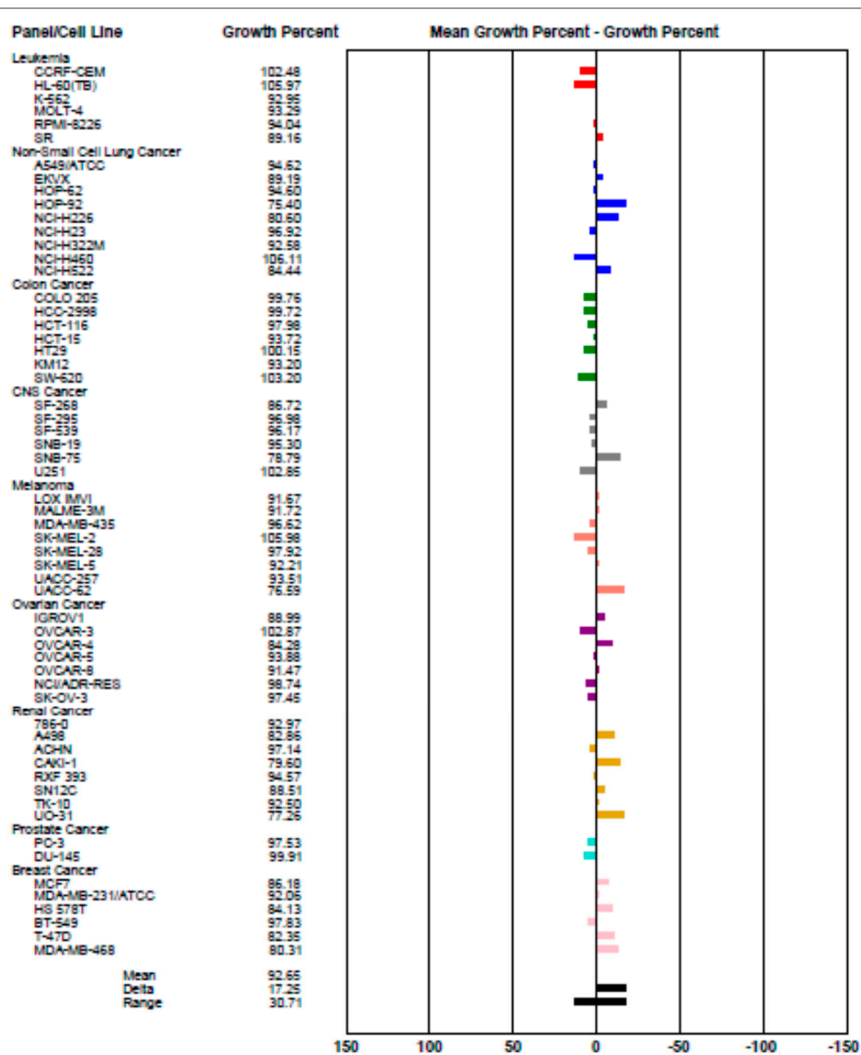

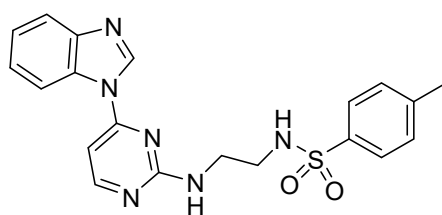

12g

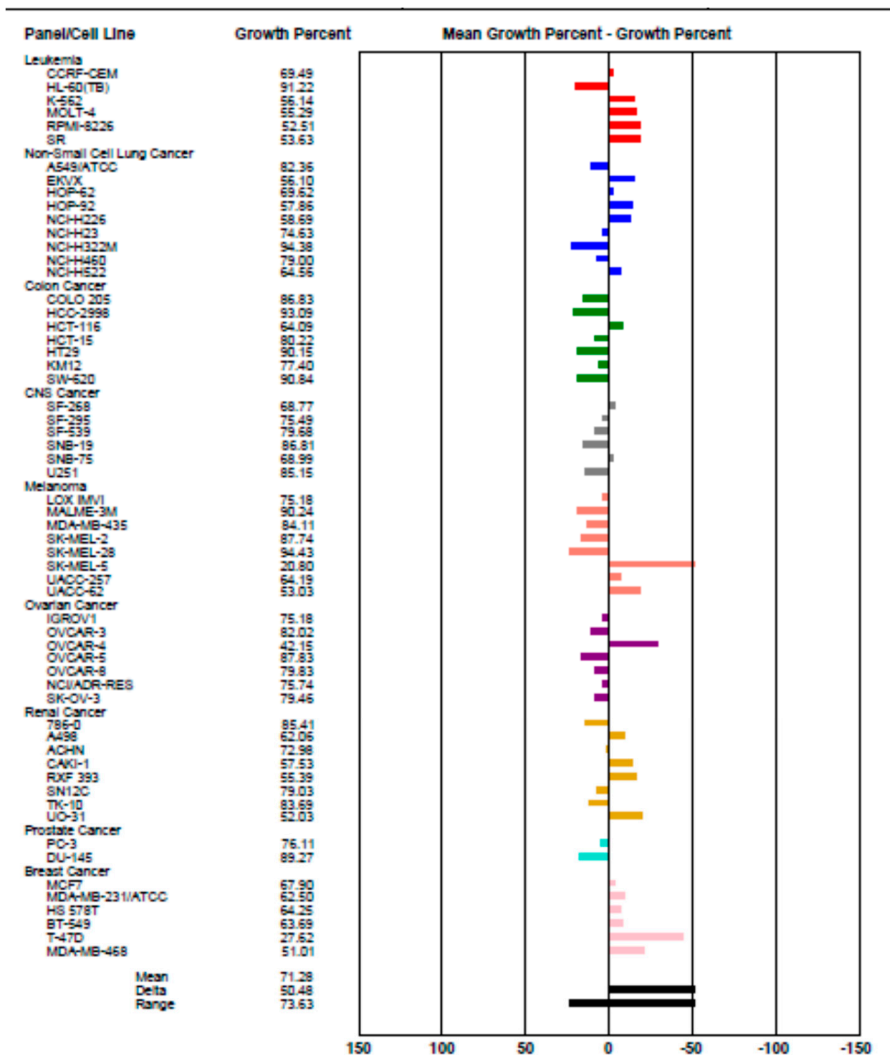

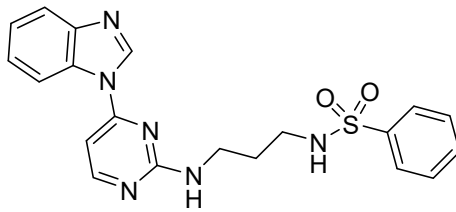

12h

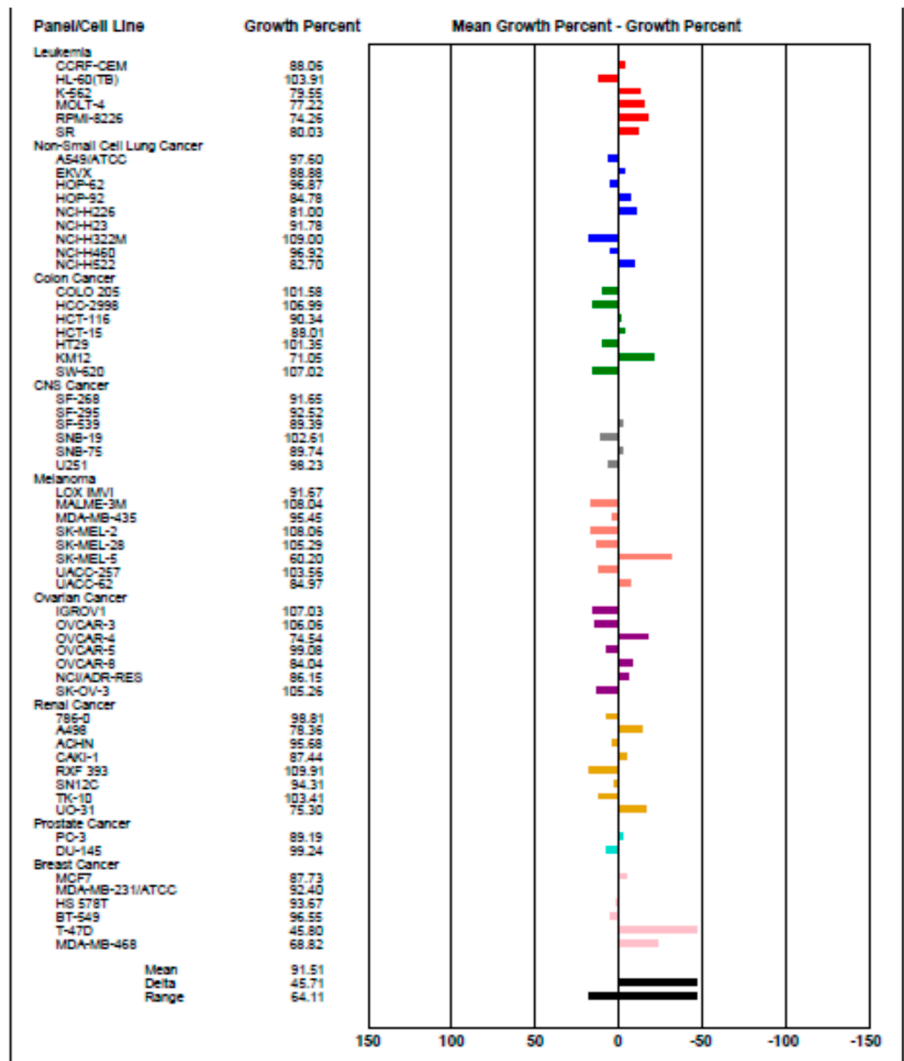

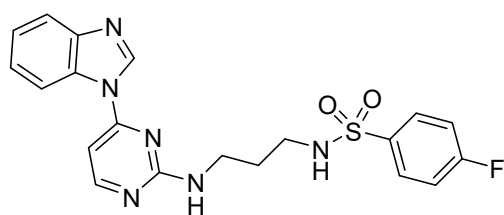

12i

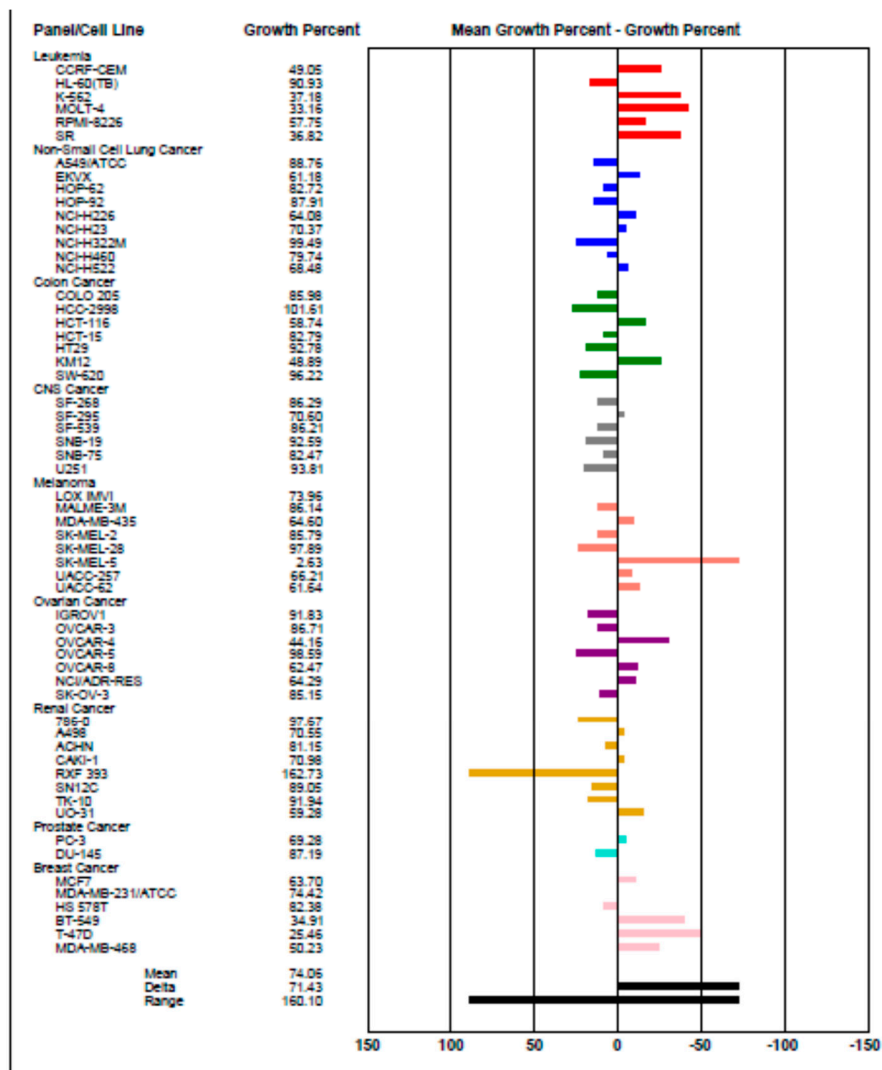

17s

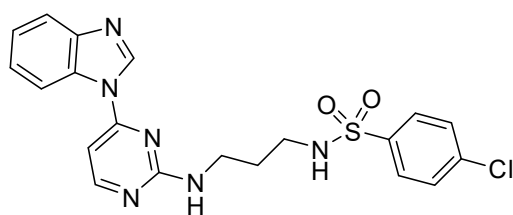

12j

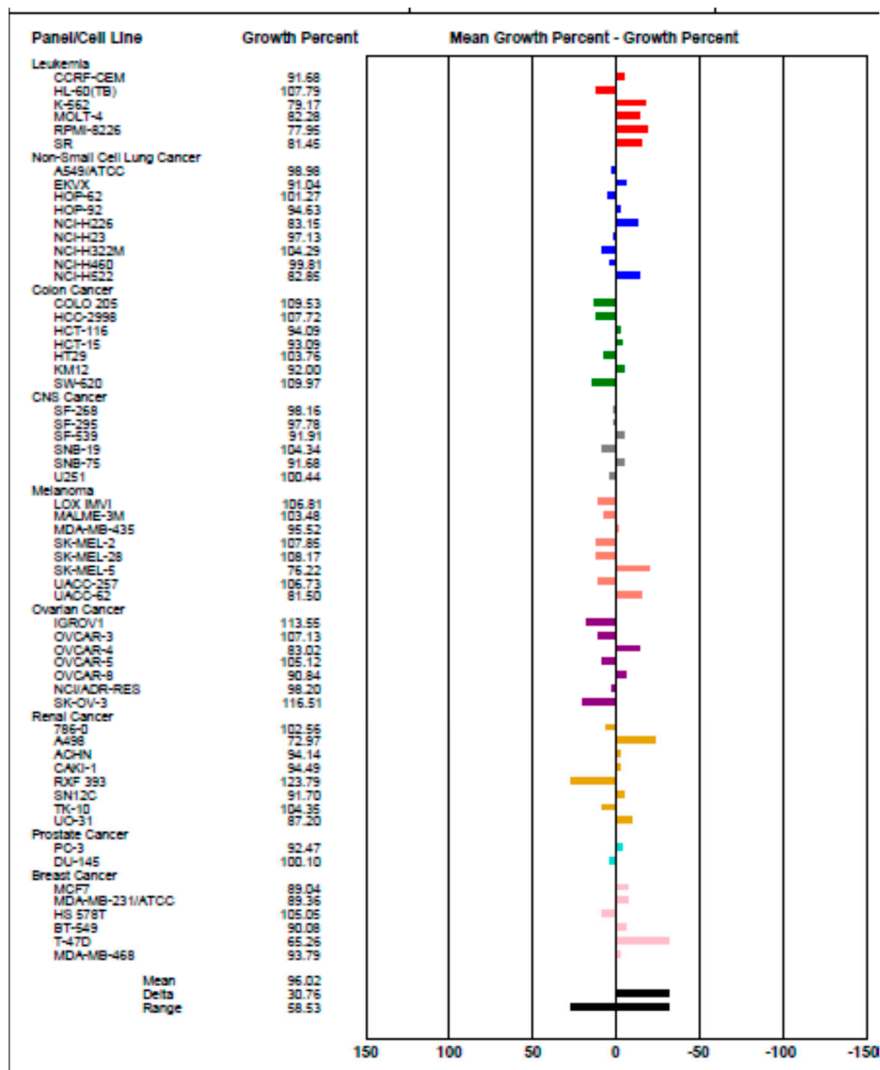

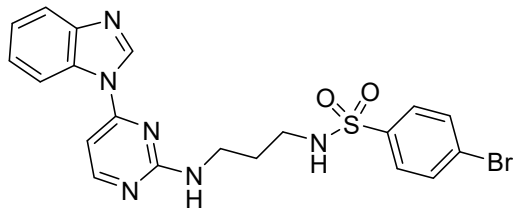

12k

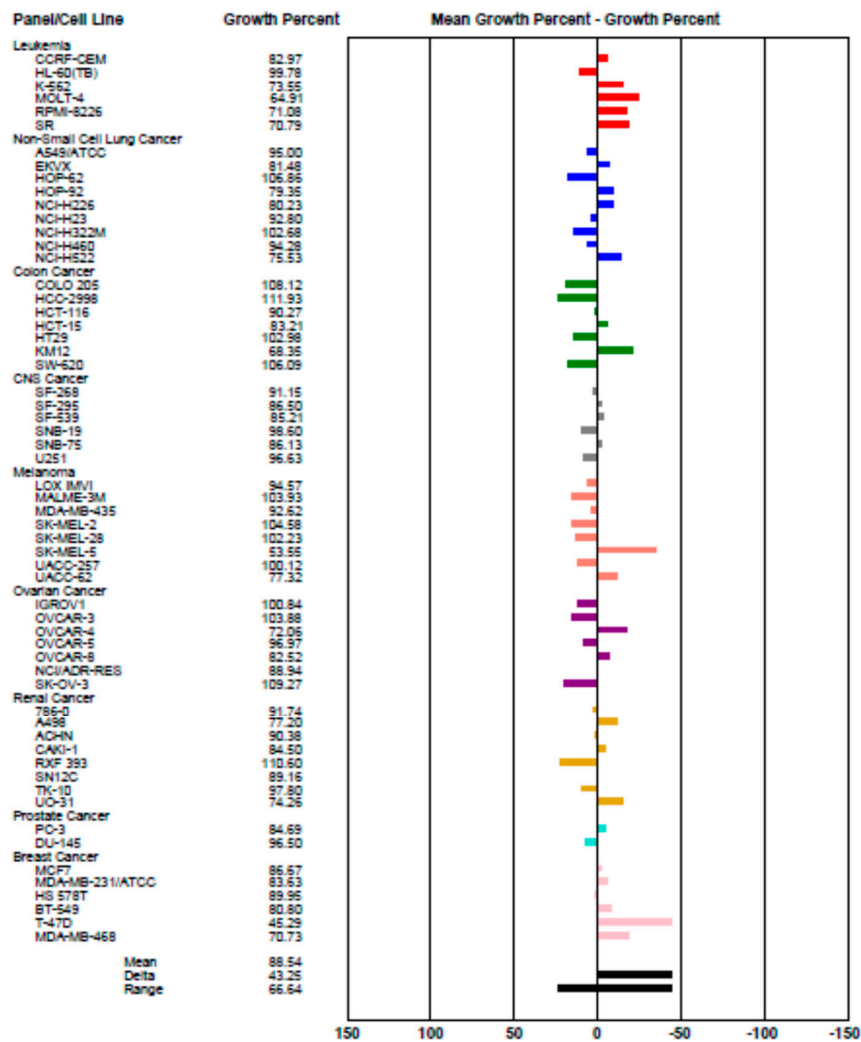

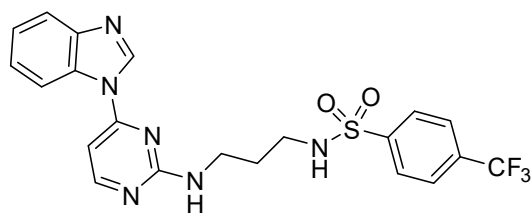

121

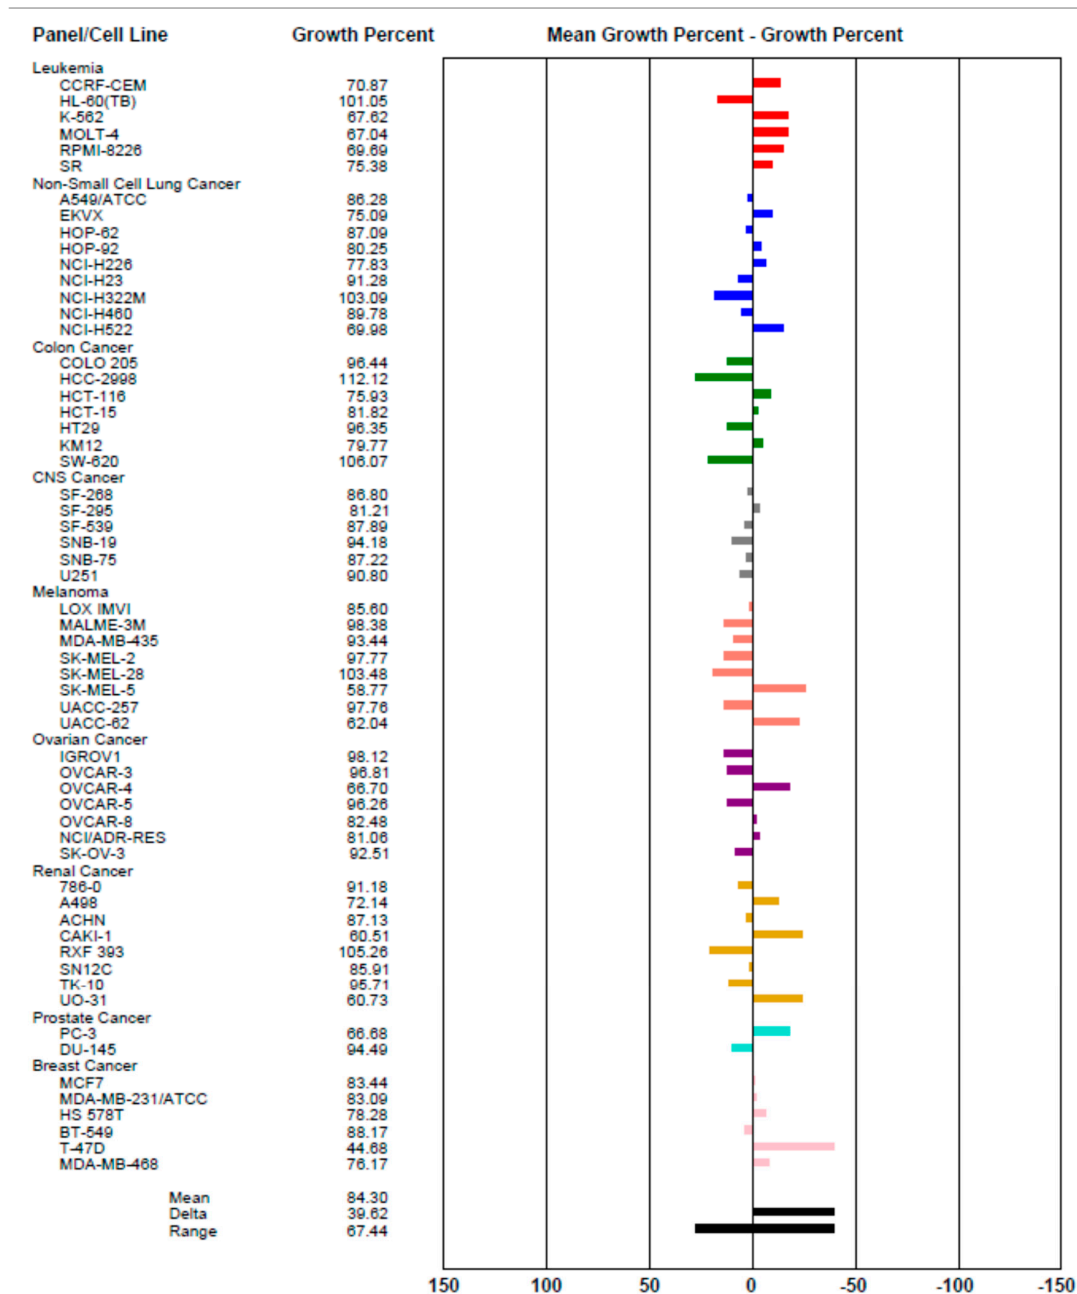

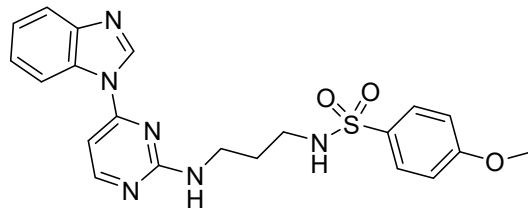

12m

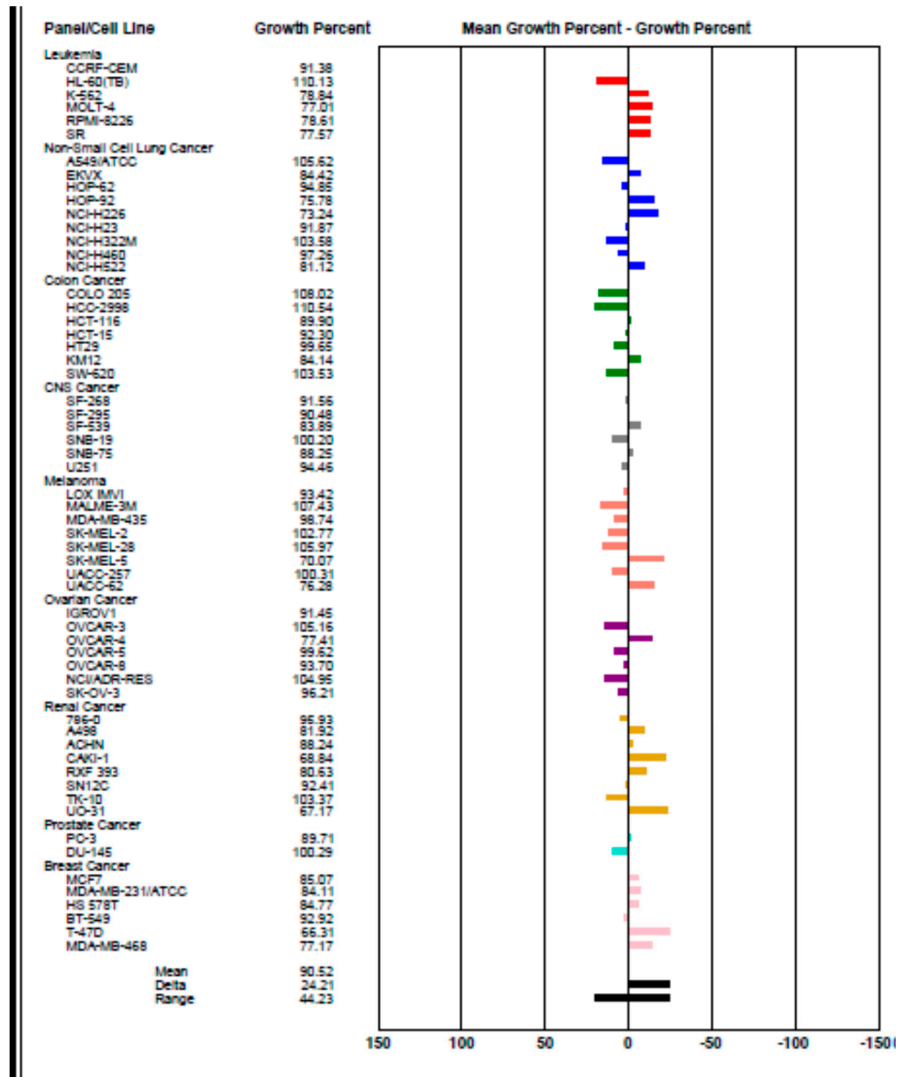

21s

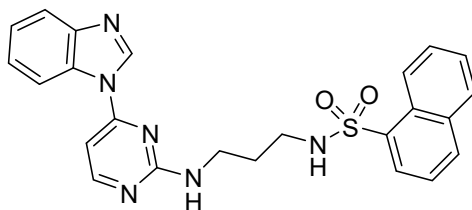

12n

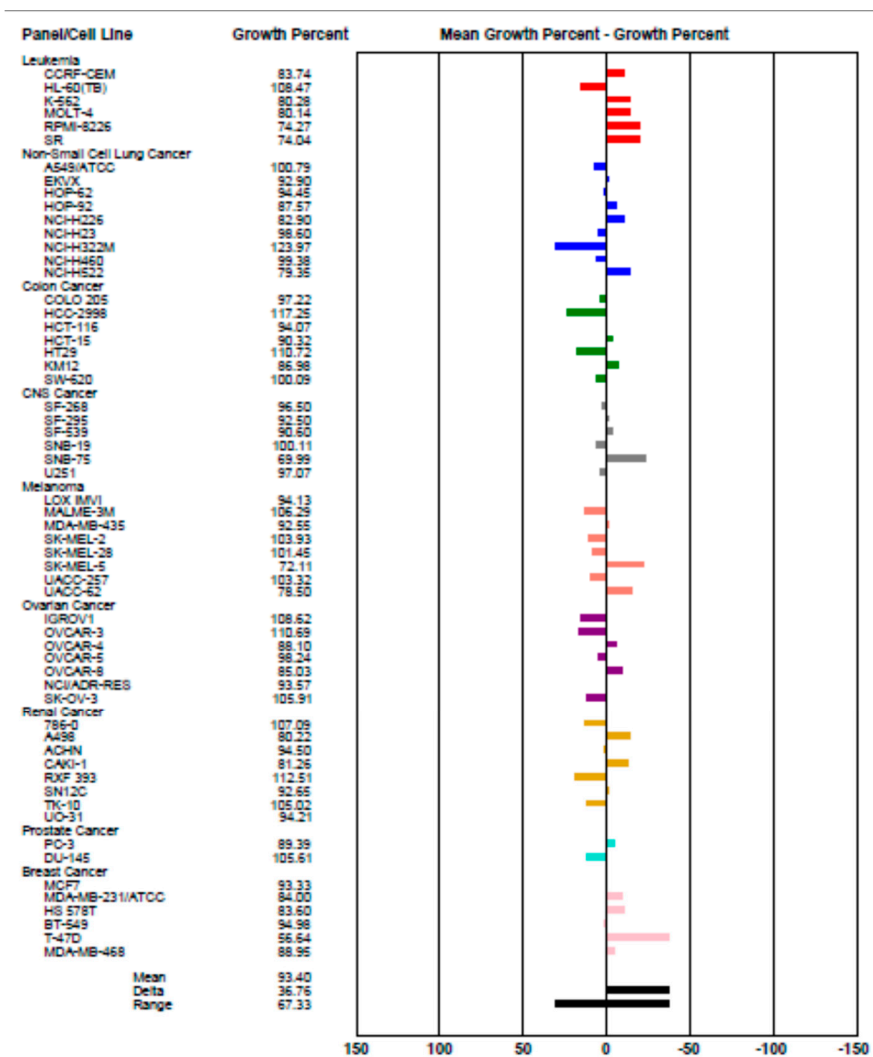

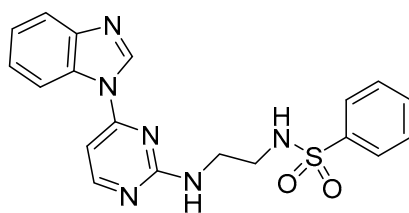

12a

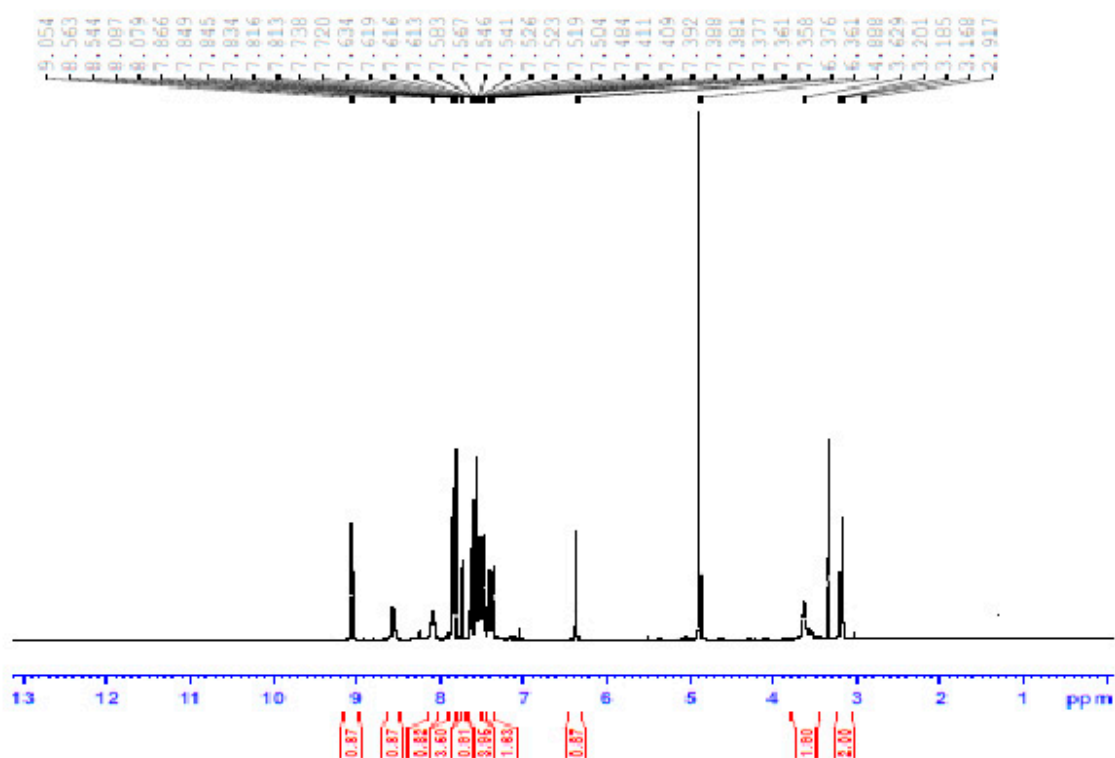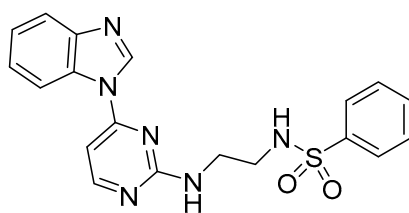

23s

**12a**

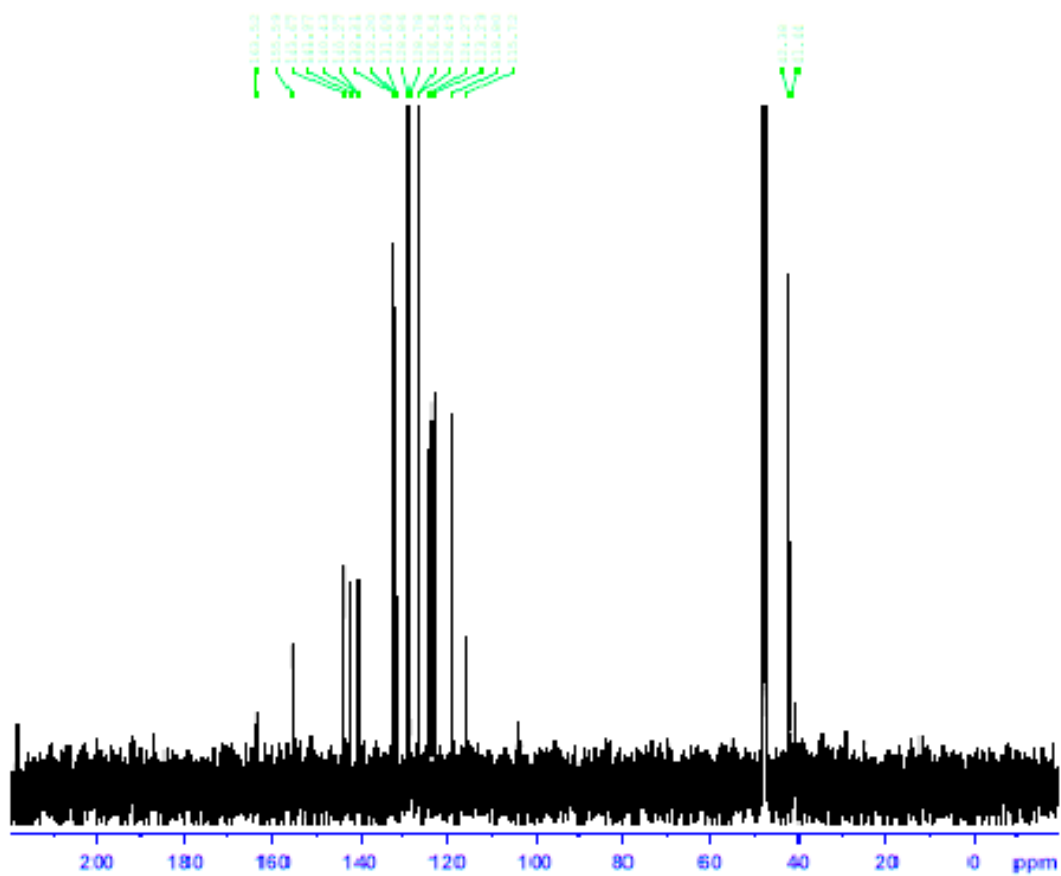

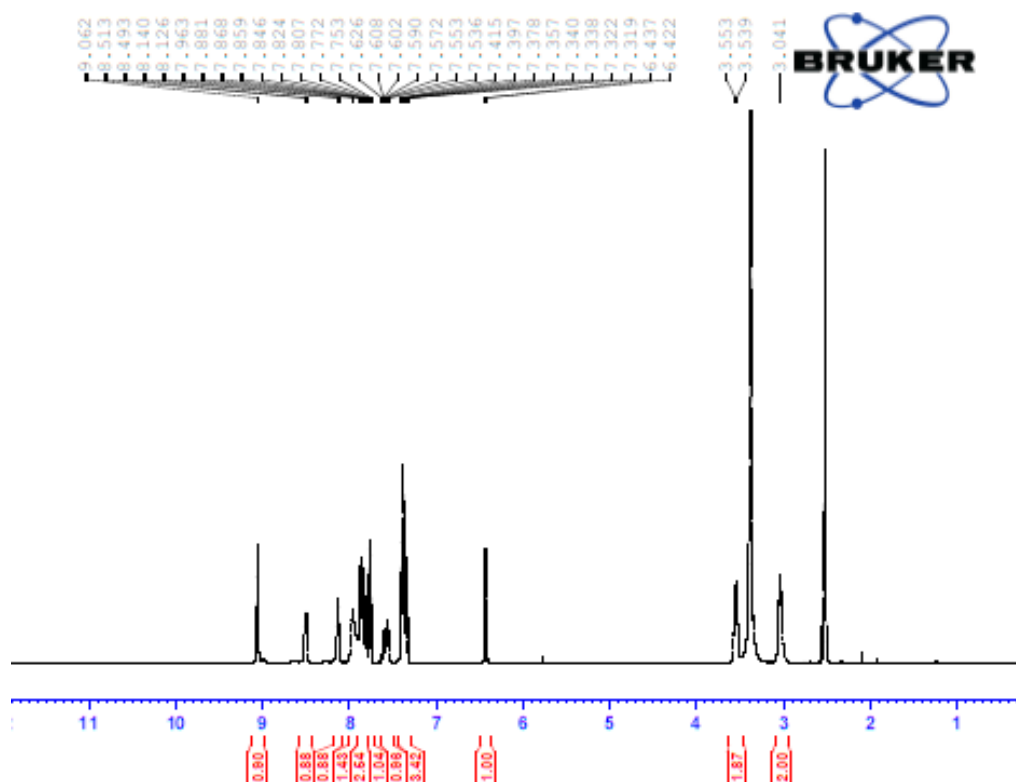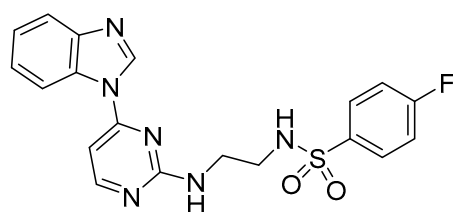

**12b**

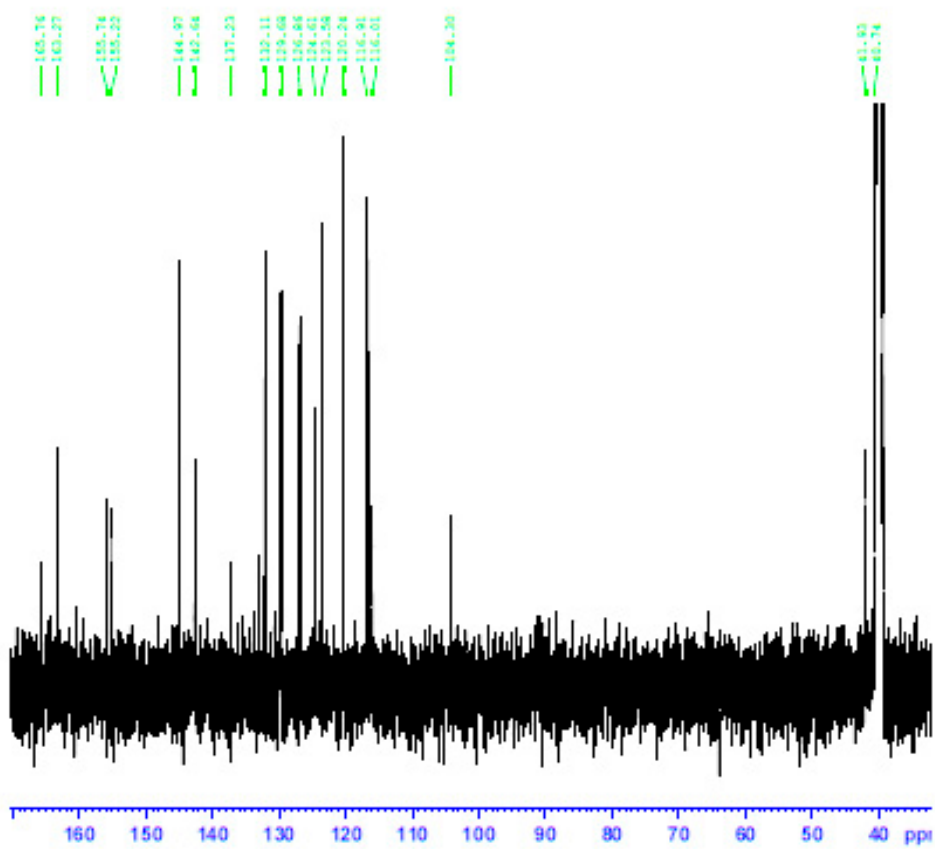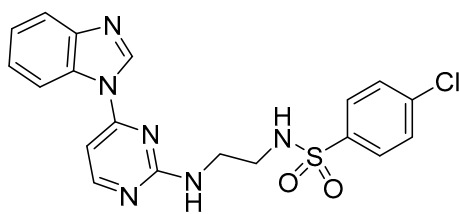

**12c**

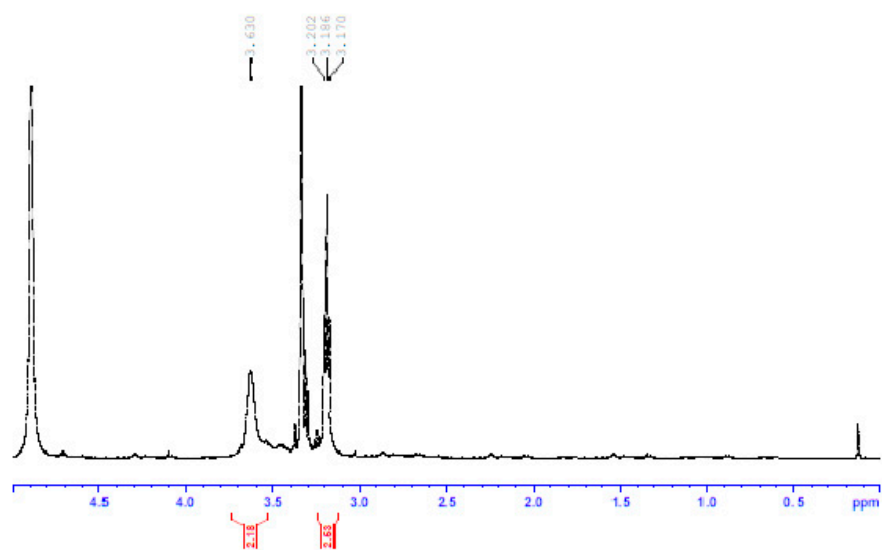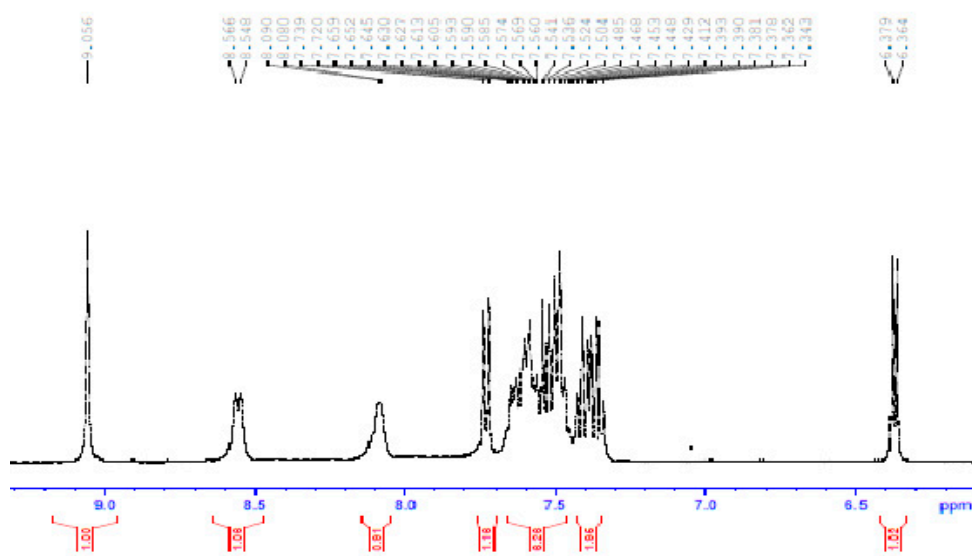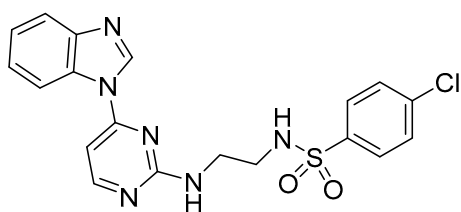

**12c**

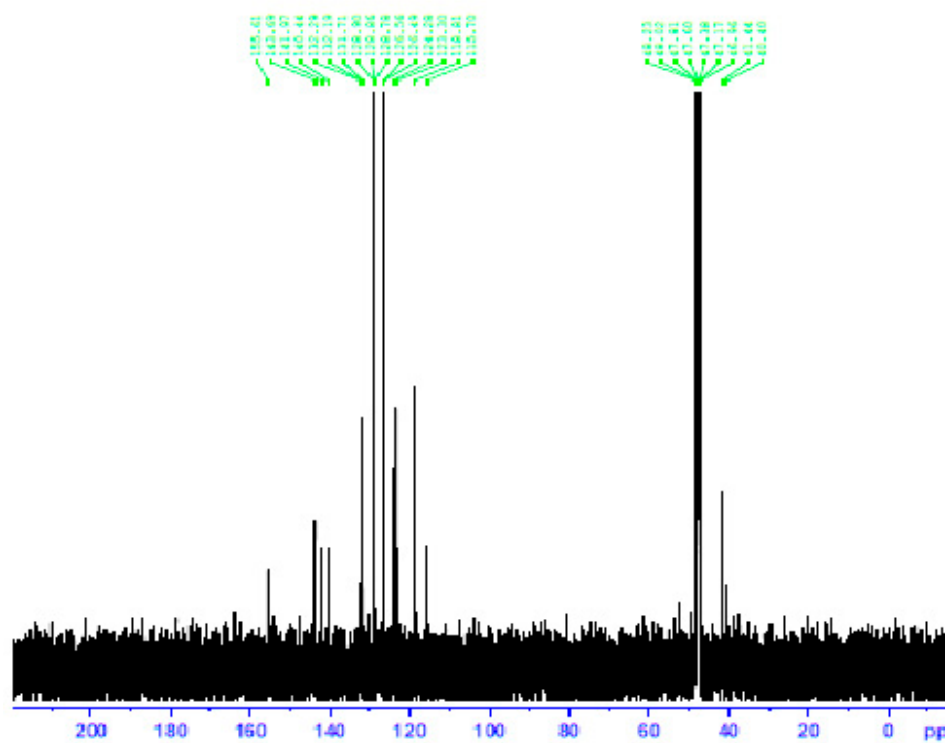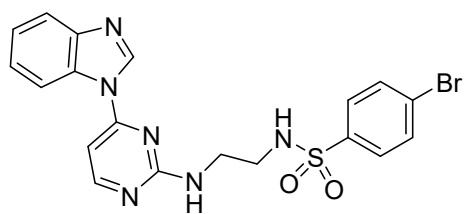

12d

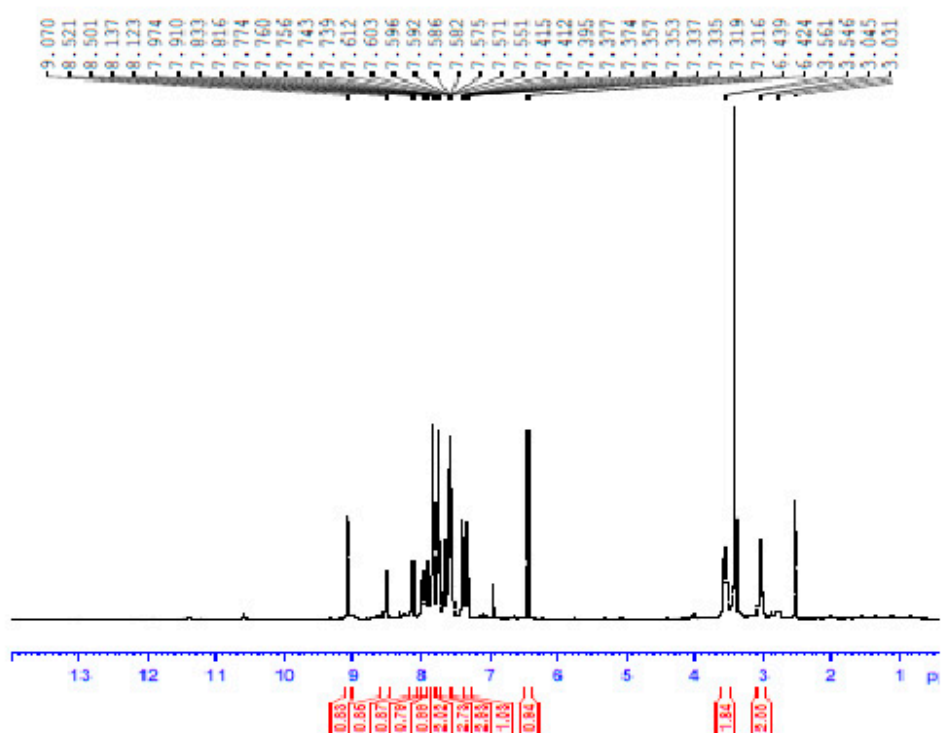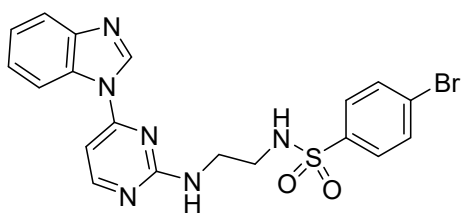

**12d**

29s

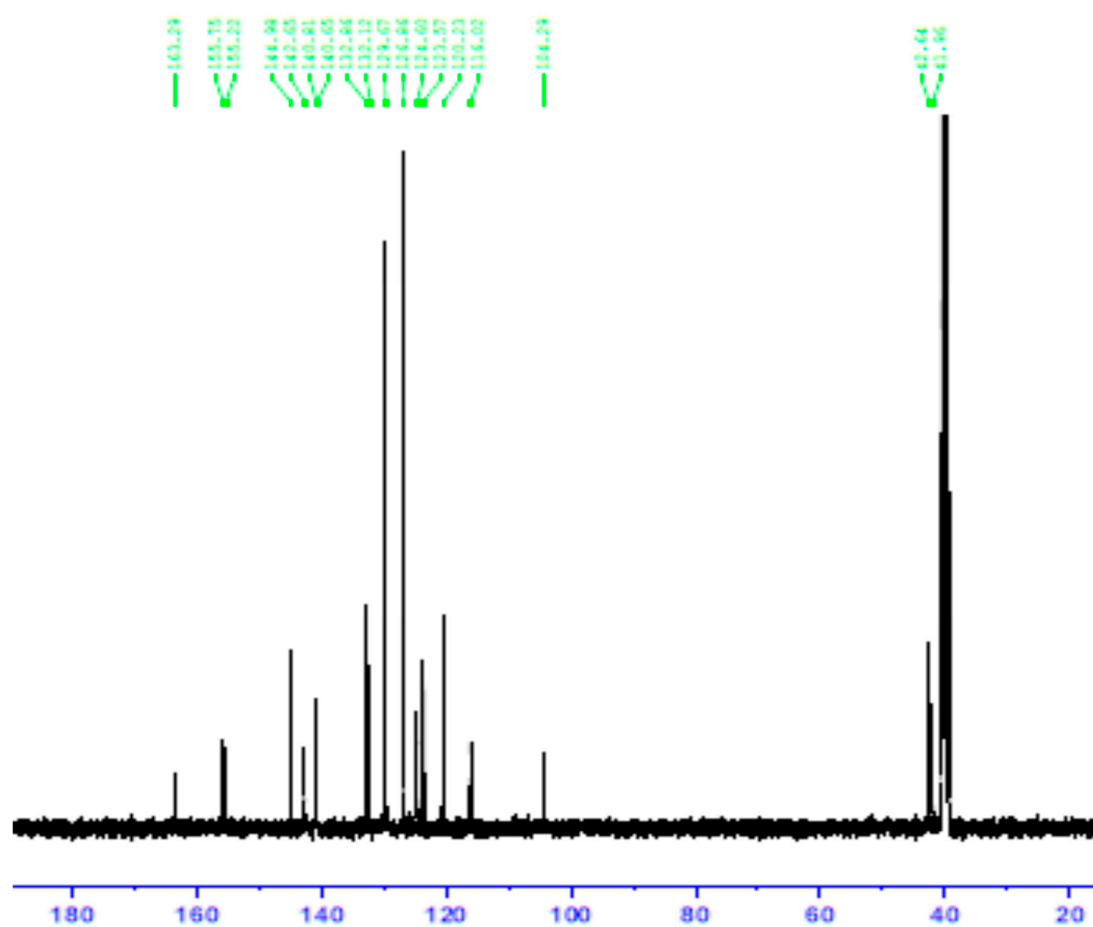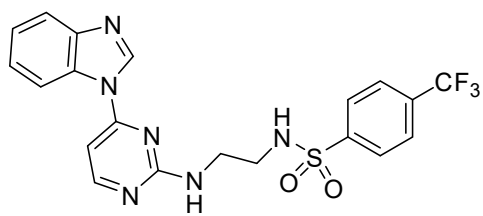

**12e**

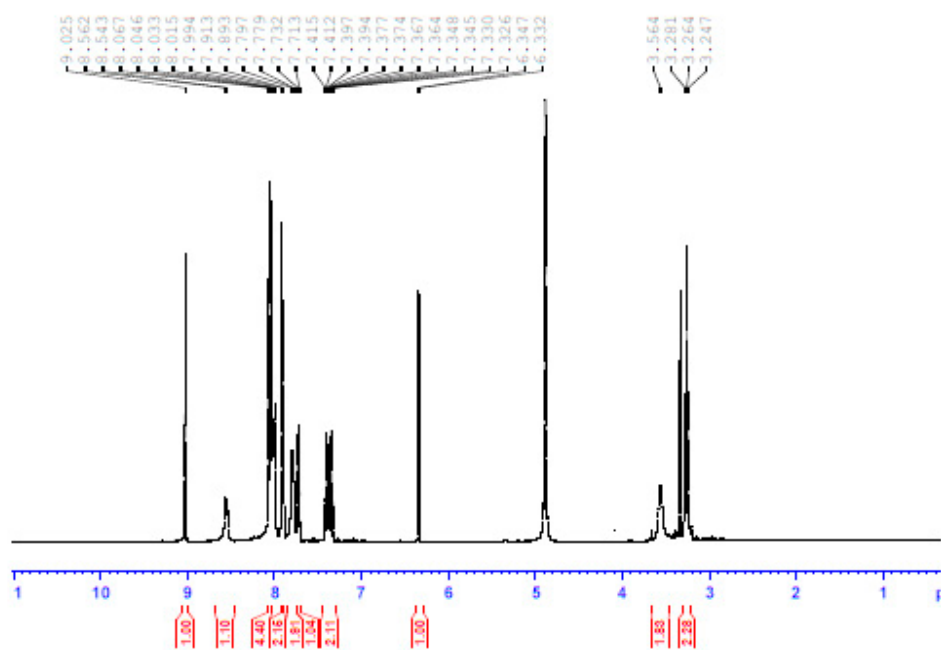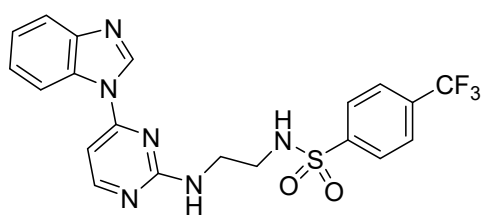

31s

**12e**

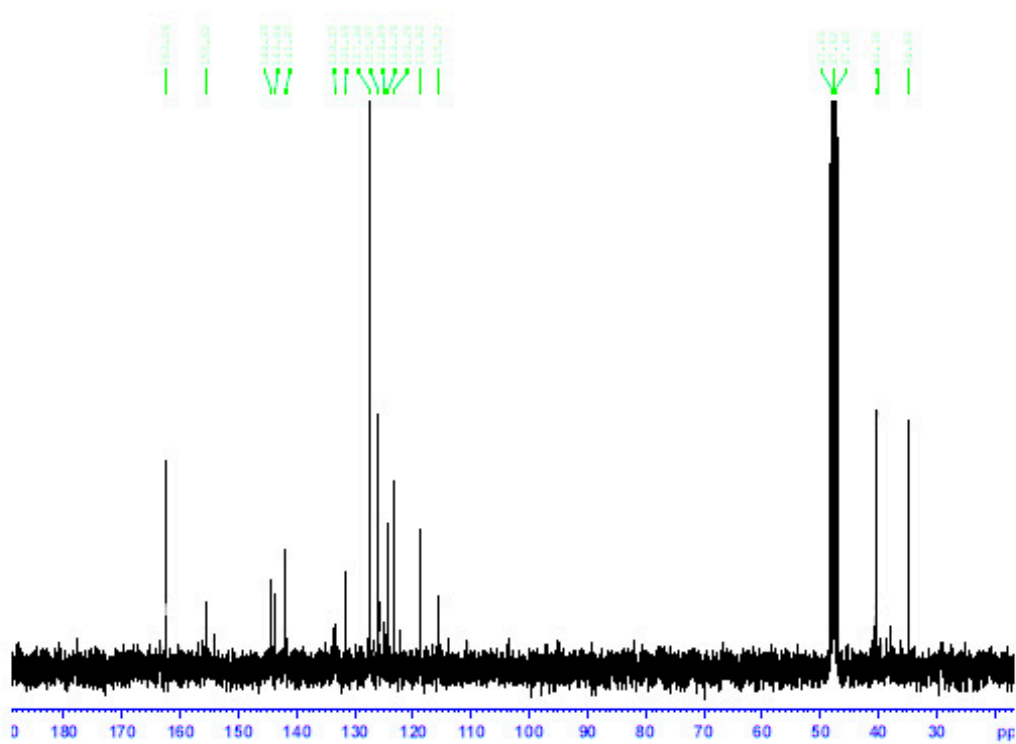

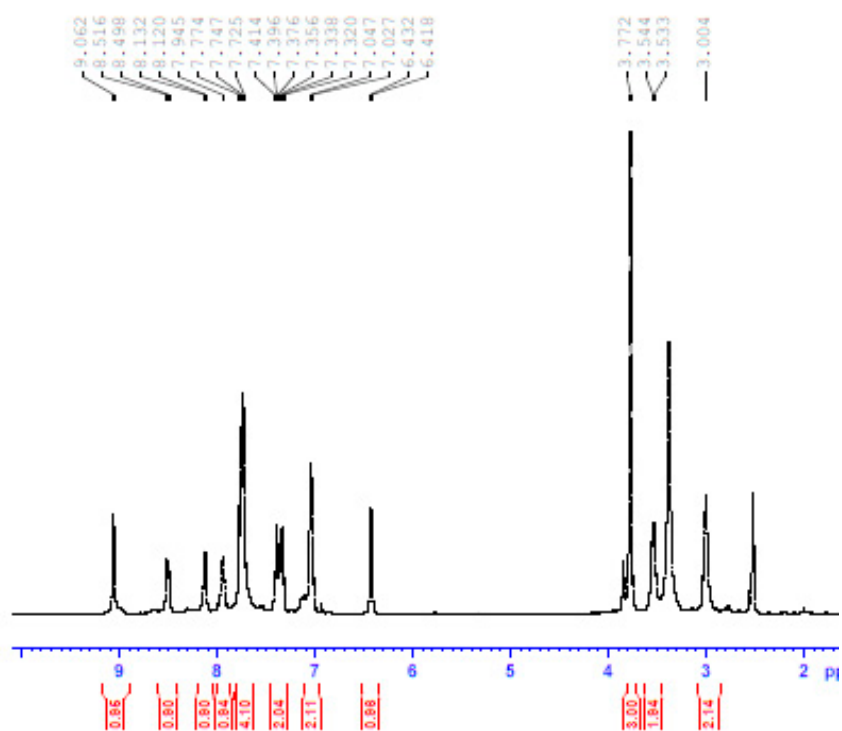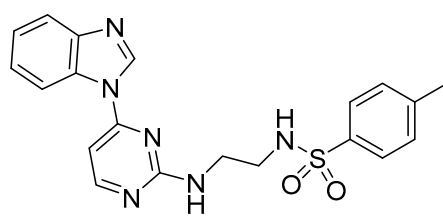

**12g**

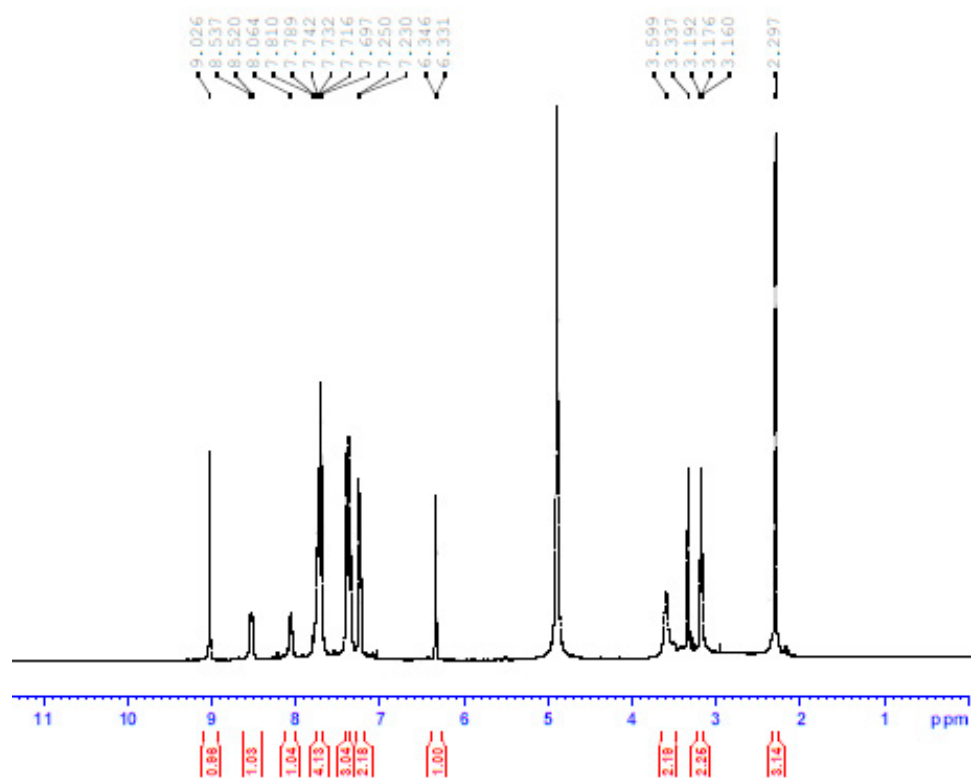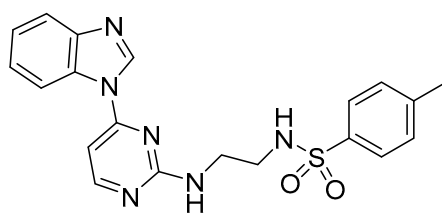

**12g**

34s

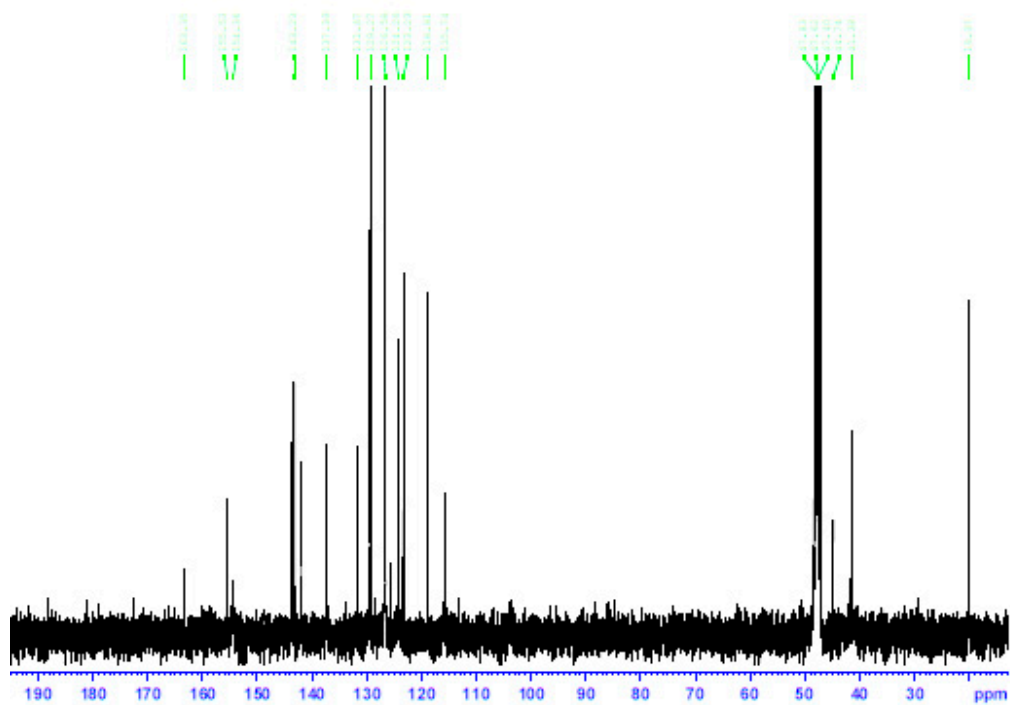

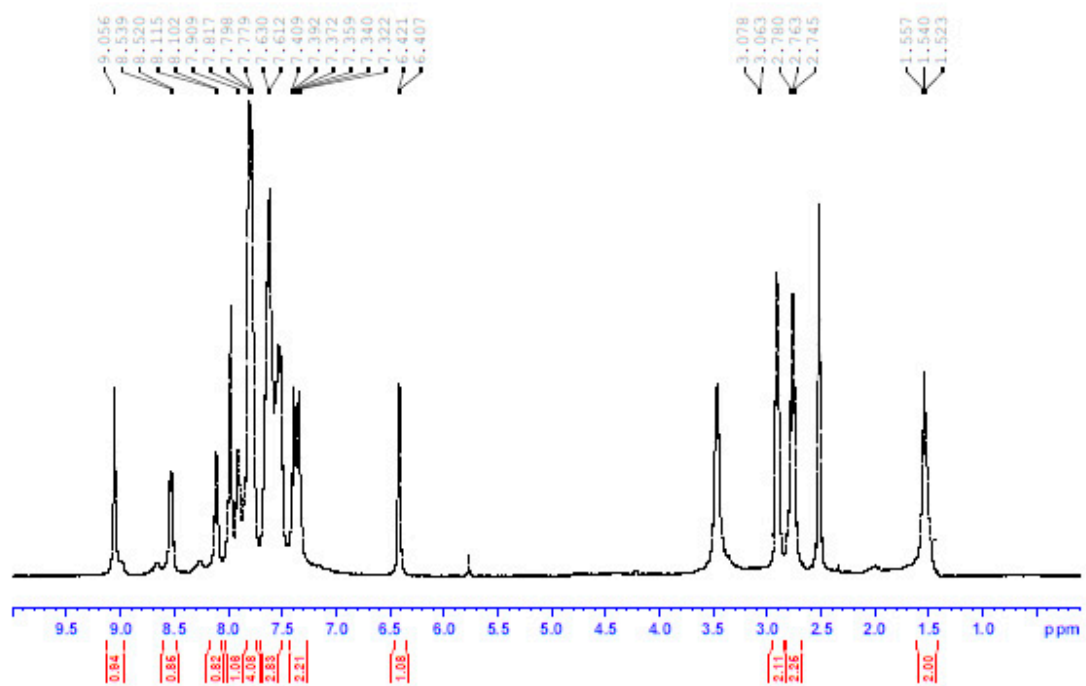

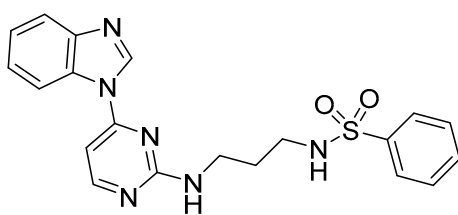

12h

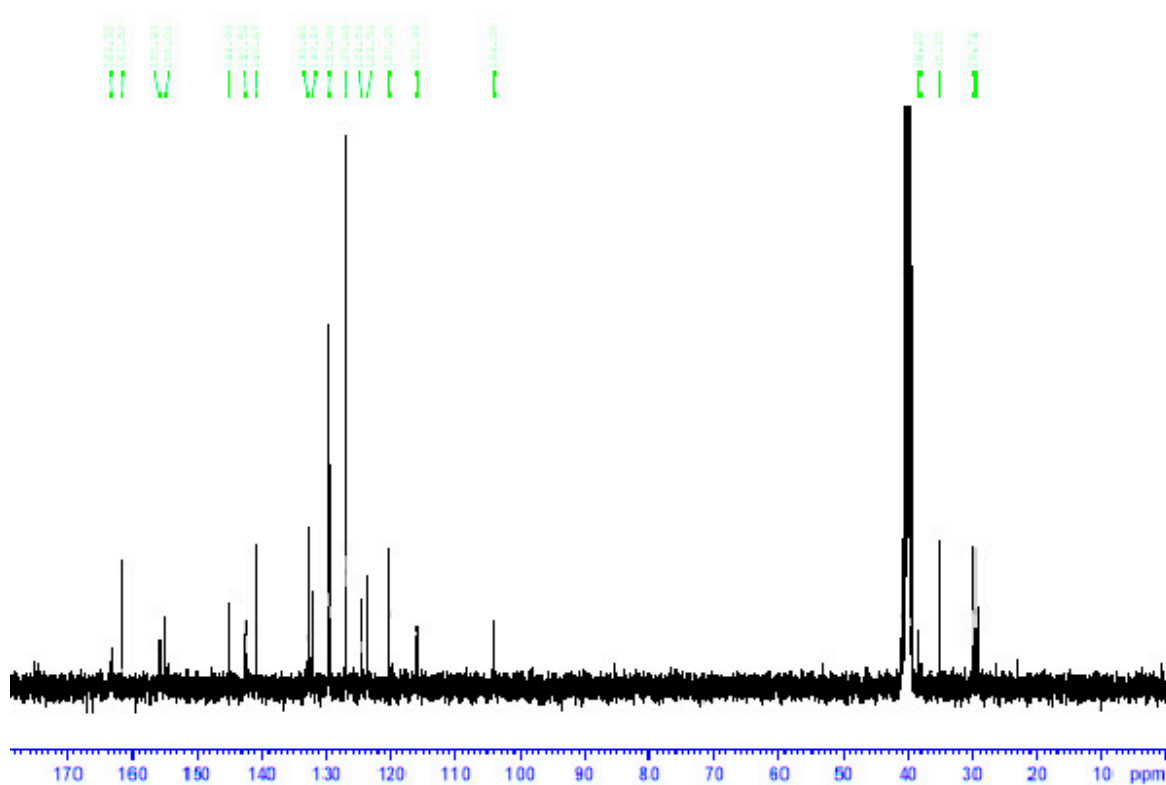

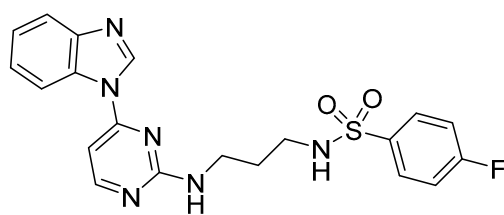

**12i**

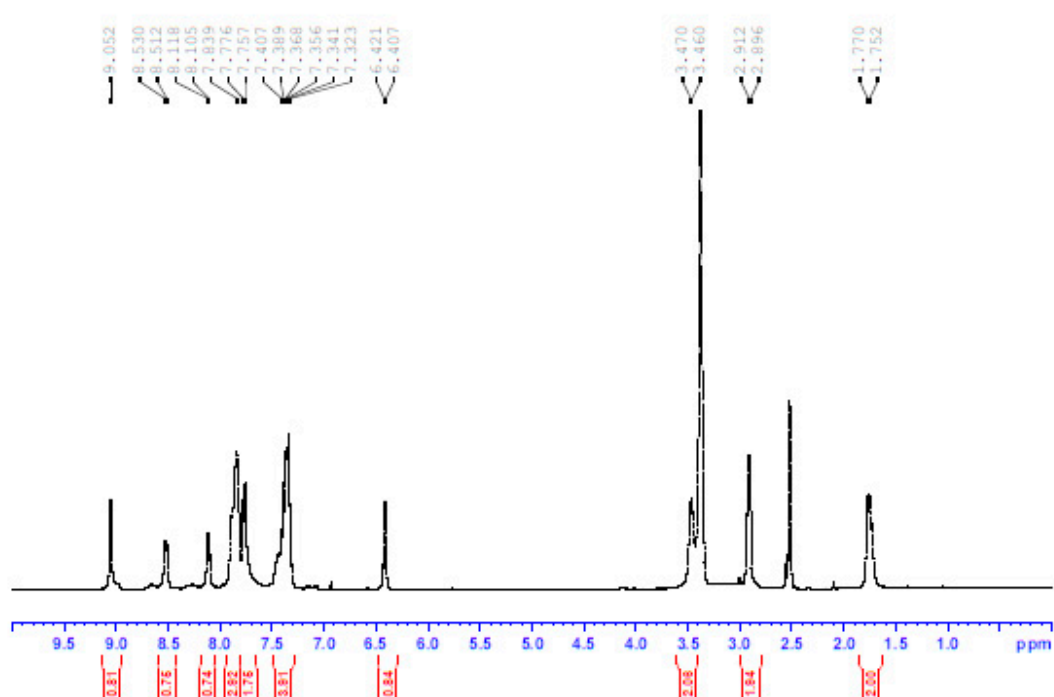

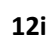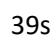

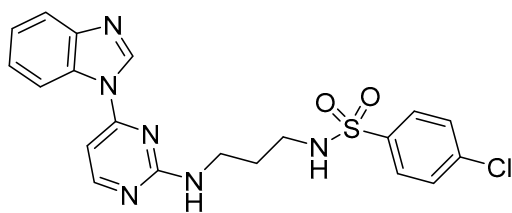

12j

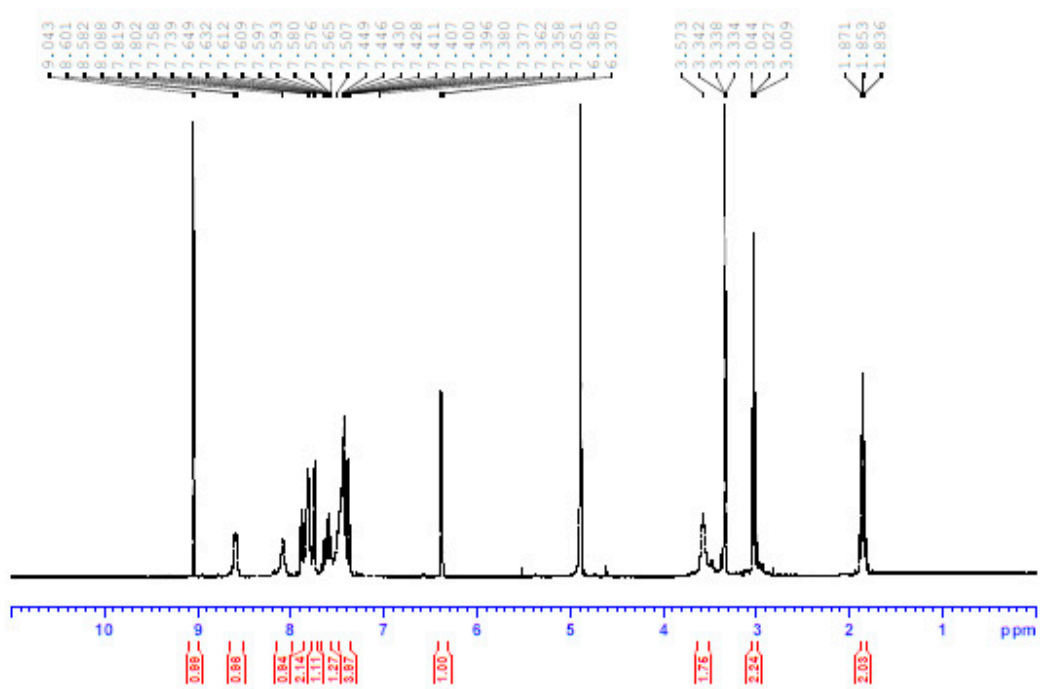

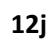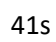

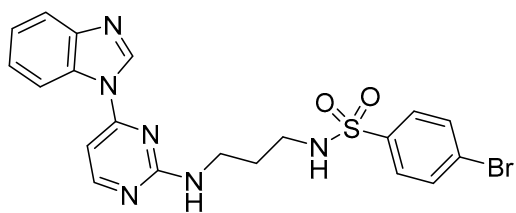

12k

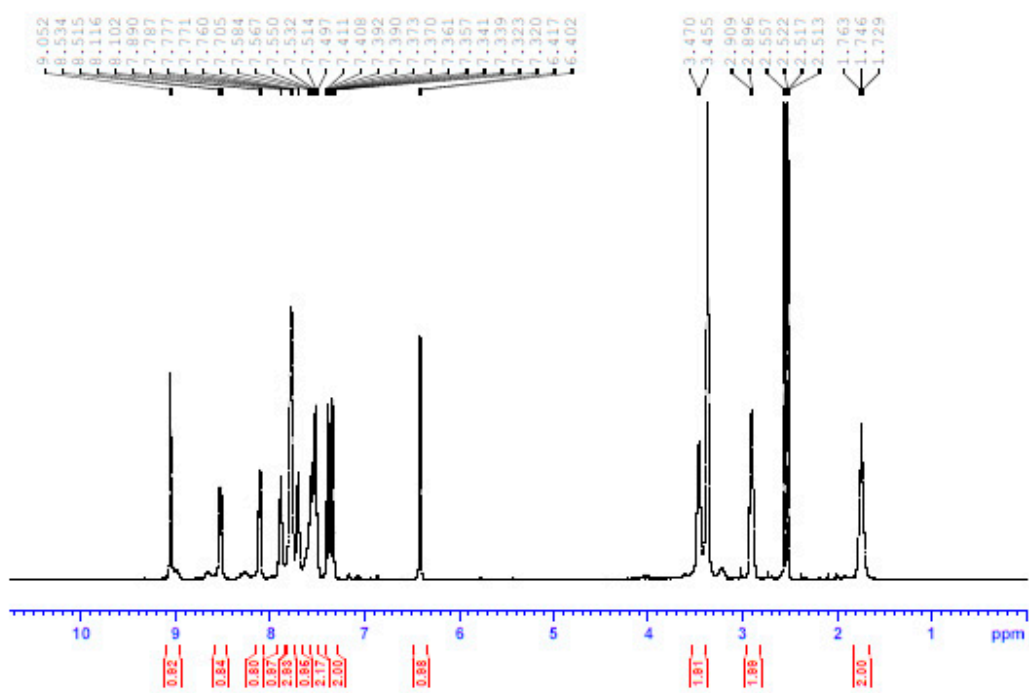

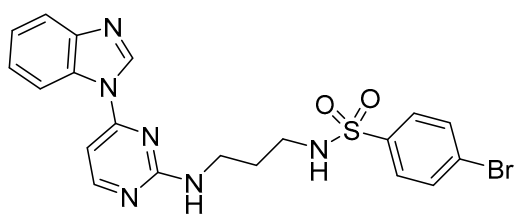

12k

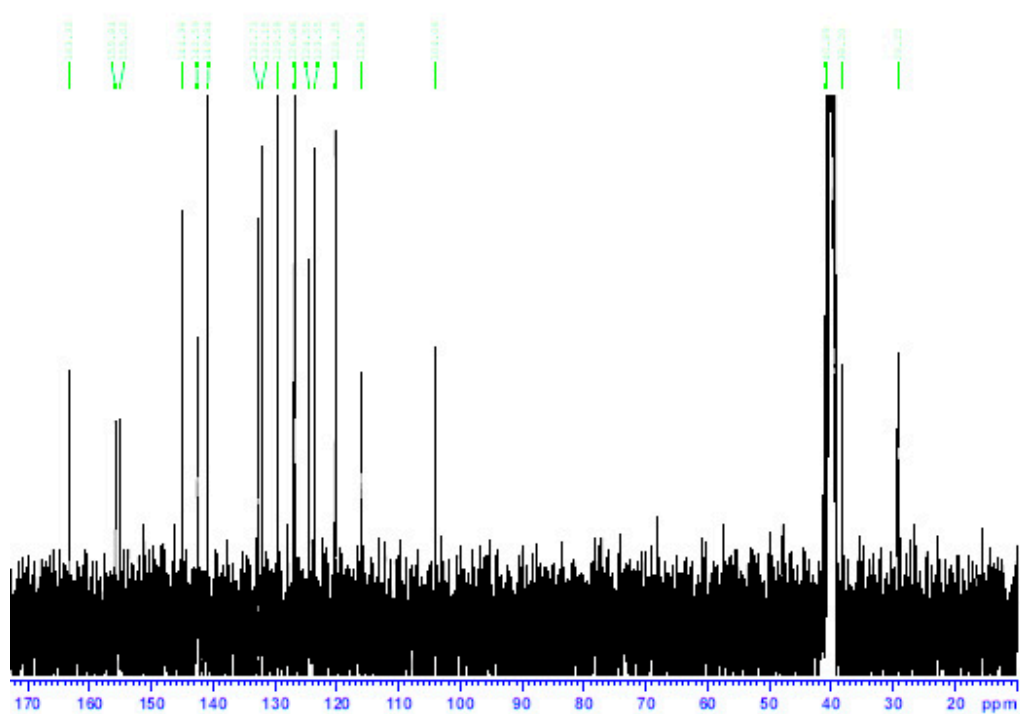

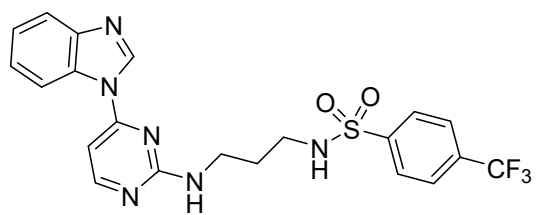

**12l**

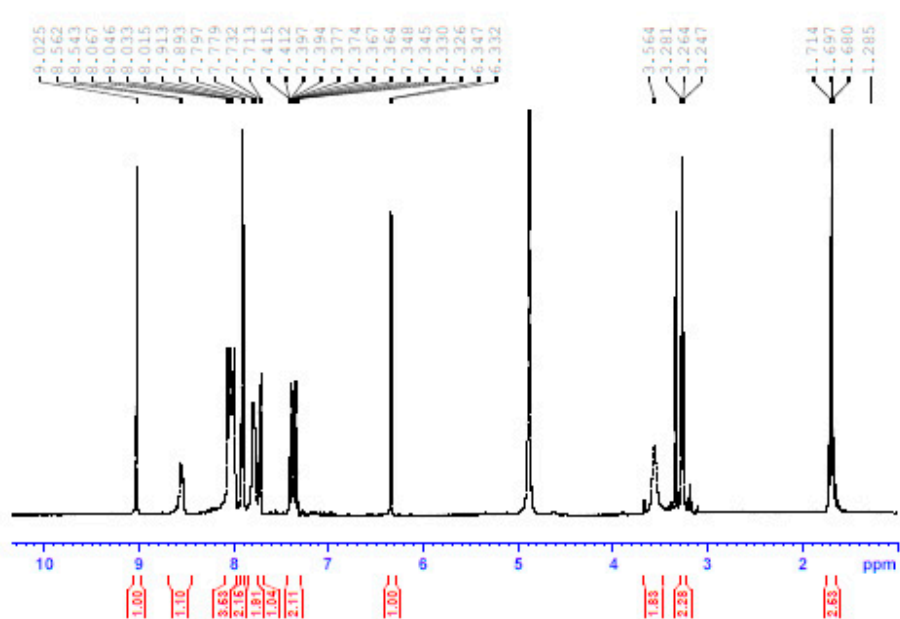

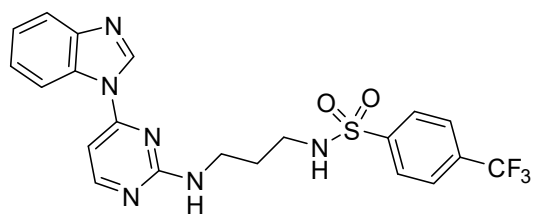

**12l**

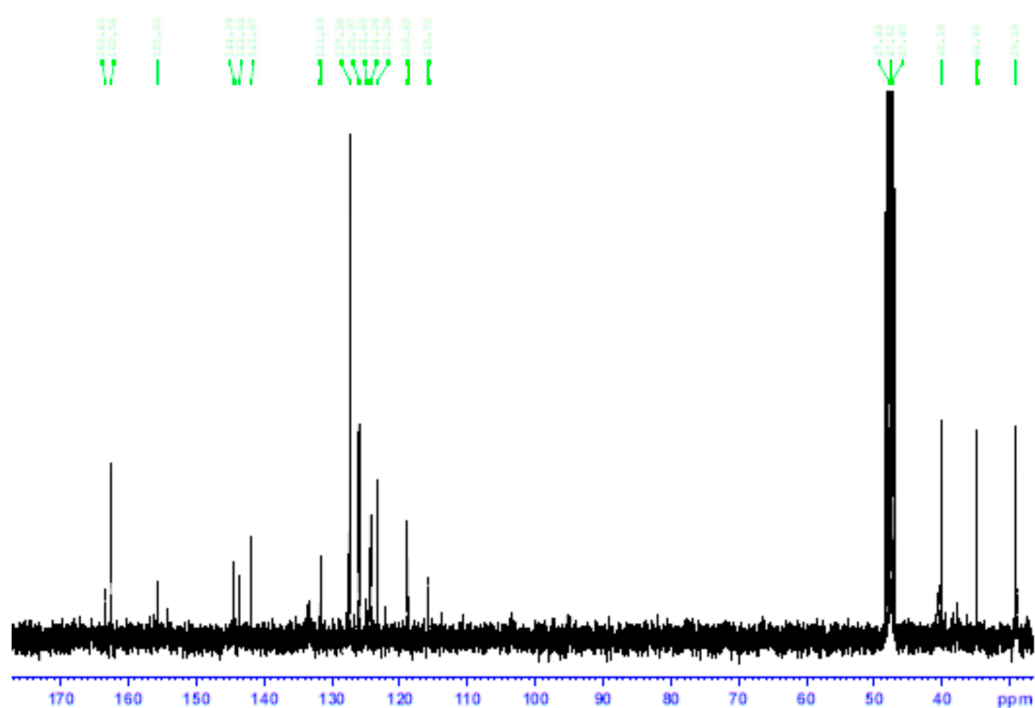

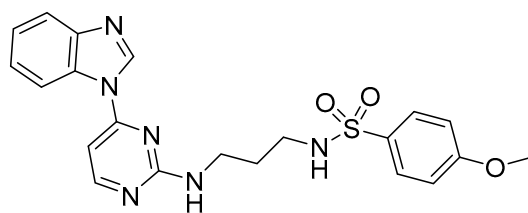

12m

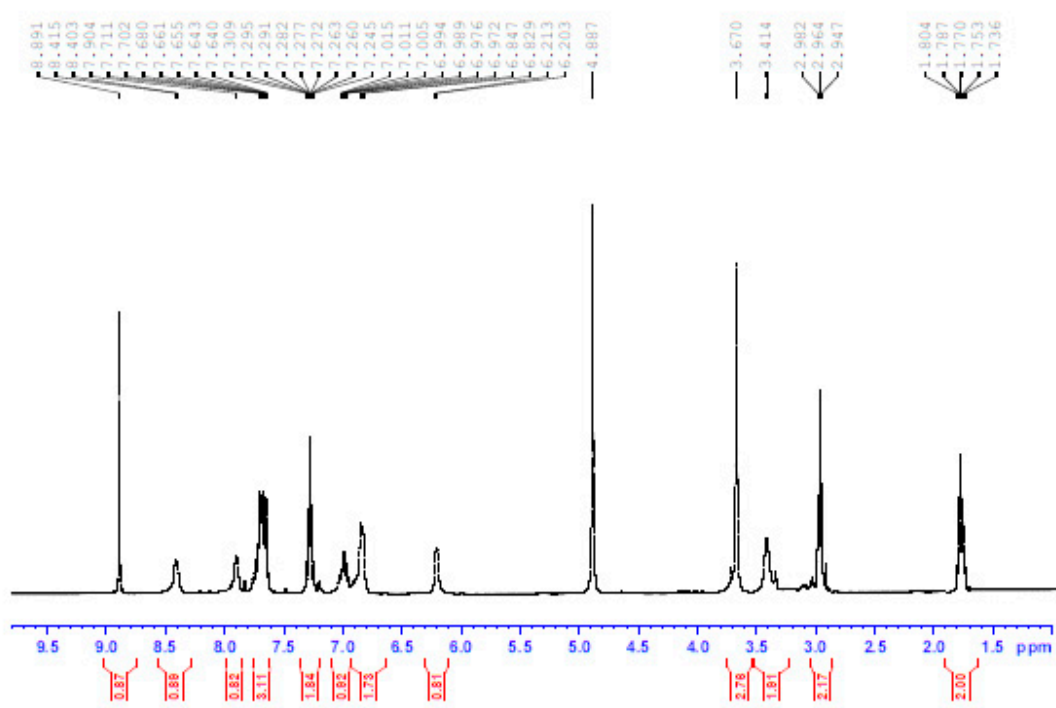

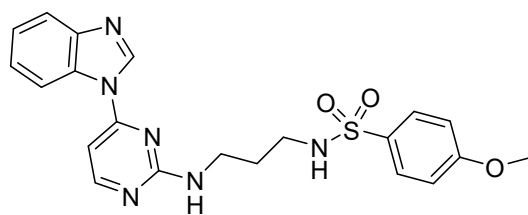

12m

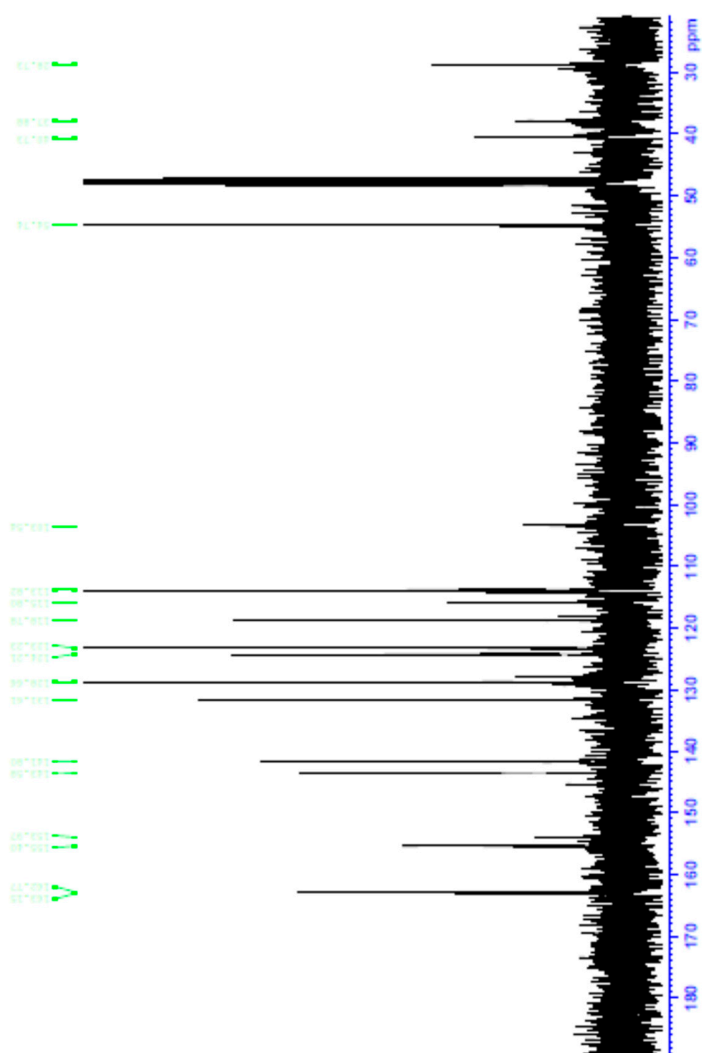

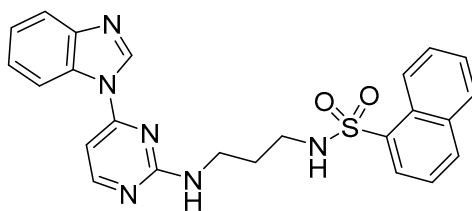

12n

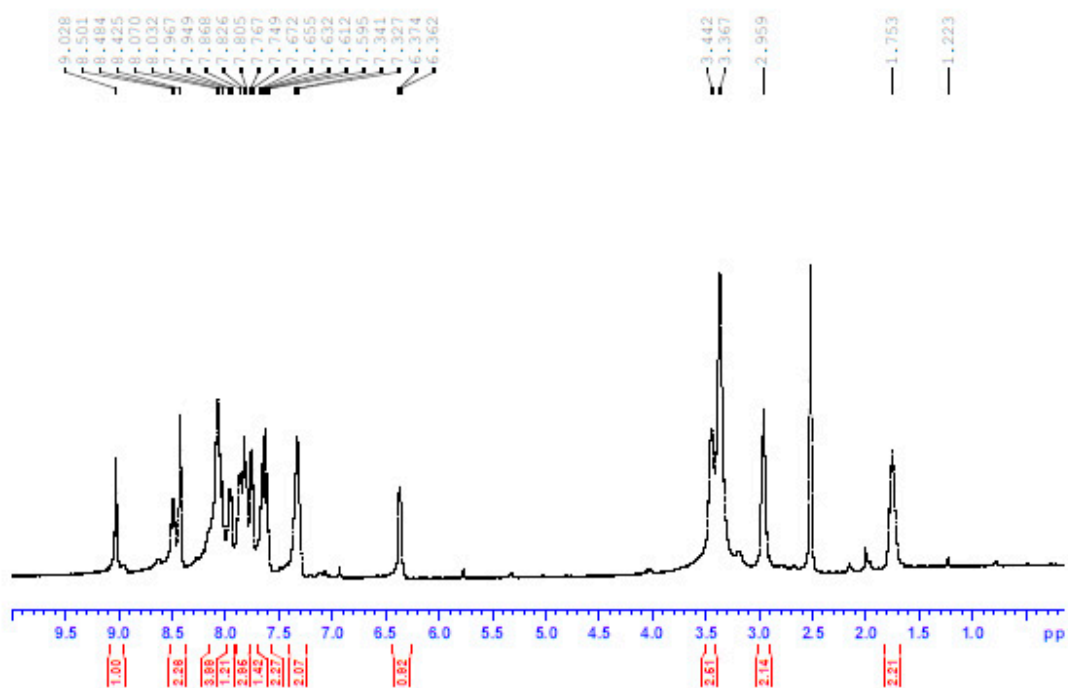

### NCI standard procedure for 60 cell lines assay

The human tumor cell lines of the cancer screening panel are grown in RPMI 1640 medium containing 5% fetal bovine serum and 2 mM L-glutamine. For a typical screening experiment, cells are inoculated into 96 well microtiter plates in 100  $\mu$ L at plating densities ranging from 5,000 to 40,000 cells/well depending on the doubling time of individual cell lines. After cell inoculation, the microtiter plates are incubated at 37° C, 5 % CO<sub>2</sub>, 95 % air and 100 % relative humidity for 24 h prior to addition of experimental drugs.

After 24 h, two plates of each cell line are fixed in situ with TCA, to represent a measurement of the cell population for each cell line at the time of drug addition (Tz). Experimental drugs are solubilized in dimethyl sulfoxide at 400-fold the desired final maximum test concentration (10  $\mu$ M) and stored frozen prior to use. At the time of drug addition, an aliquot of frozen concentrate is thawed and diluted to twice the desired final maximum test concentration with complete medium containing 50  $\mu$ g/ml gentamicin. Additional four, 10-fold or ½ log serial dilutions are made to provide a total of five drug concentrations plus control. Aliquots of 100  $\mu$ l of these different drug dilutions are added to the appropriate microtiter wells already containing 100  $\mu$ l of medium, resulting in the required final drug concentrations.

Following drug addition, the plates are incubated for an additional 48 h at 37°C, 5 % CO<sub>2</sub>, 95 % air, and 100 % relative humidity. For adherent cells, the assay is terminated by the addition of cold TCA. Cells are fixed in situ by the gentle addition of 50  $\mu$ l of cold 50 % (w/v) TCA (final concentration, 10 % TCA) and incubated for 60 minutes at 4°C. The supernatant is discarded, and the plates are washed five times with tap water and air dried. Sulforhodamine B (SRB) solution (100  $\mu$ l) at 0.4 % (w/v) in 1 % acetic acid is added to each well, and plates are incubated for 10 minutes at room temperature. After staining, unbound dye is removed by washing five times with 1 % acetic acid and the plates are air dried. Bound stain is subsequently solubilized with 10 mM trizma base, and the absorbance is read on an automated plate reader at a wavelength of 515 nm. For suspension cells, the methodology is the same except that the assay is terminated by fixing settled cells at the bottom of the wells by gently adding 50  $\mu$ l of 80 % TCA (final concentration, 16 % TCA). Using the seven absorbance measurements [time zero, (Tz), control growth, (C), and test growth in the presence of drug at the five concentration levels (Ti)], the percentage growth is calculated at each of the drug concentrations levels. Percentage growth inhibition is calculated as:

$[(Ti - Tz)/(C - Tz)] \times 100$  for concentrations for which  $Ti \geq Tz$

$[(Ti - Tz)/Tz] \times 100$  for concentrations for which  $Ti < Tz$ .

Three dose response parameters are calculated for each experimental agent. Growth inhibition of 50 % (GI50) is calculated from  $[(Ti - Tz)/(C - Tz)] \times 100 = 50$ , which is the drug concentration resulting in a 50% reduction in the net protein increase (as measured by SRB staining) in control cells during the drug incubation. The drug concentration resulting in total growth inhibition (TGI) is calculated from  $Ti = Tz$ . The LC50 (concentration of drug resulting in a 50% reduction

in the measured protein at the end of the drug treatment as compared to that at the beginning) indicating a net loss of cells following treatment is calculated from  $[(Ti-Tz)/Tz] \times 100 = -50$ . Values are calculated for each of these three parameters if the level of activity is reached; however, if the effect is not reached or is exceeded, the value for that parameter is expressed as greater or less than the maximum or minimum concentration tested.

## **Evaluation of the Antiproliferative Activity Against A375 and SK-MEL-5**

A375 and SK-MEL-5 cells were purchased from American Type Culture Collection (ATCC, Rockville, MD, USA) and maintained in Dulbecco's modified eagle medium (DMEM, Welgene, Daegu, Republic of Korea) supplemented with 10% fetal bovine serum (FBS, Welgene, Daegu, Republic of Korea) and 1% penicillin/streptomycin (Welgene, Daegu, Republic of Korea) in a humidified atmosphere with 5% CO<sub>2</sub> at 37 °C. Both cells were taken from culture substrate with 0.05% trypsin-0.02% EDTA and plated at a density of  $5 \times 10^3$  cells/well in 96 well plates and then incubated at 37 °C for 24 h in a humidified atmosphere with 5% CO<sub>2</sub> prior to treatment with various concentrations (3-fold serial dilution, 12 points) of the tested compounds. The cells were incubated for 48 h after treatment with the test compounds. The cell viability was assessed by the conventional 3-(4,5-dimethylthiazol-2-yl)-2,5-diphenyltetrazolium bromide (MTT) reduction assay. MTT assays were carried out with CellTiter 96® (Promega) according to the manufacturer's instructions. The absorbance at 590 nm was recorded using EnVision 2103 (Perkin Elmer; Boston, MA, USA). The IC<sub>50</sub> values were calculated using GraphPad Prism 4.0 software.

## Enzyme assay

Reaction Biology Corp. Kinase HotSpot™ service

<http://www.reactionbiology.com> was used for screening of compounds IC<sub>50</sub>

Profiler Express for IC<sub>50</sub> measurement. Assay protocol: In a final reaction volume of 25 µL, kinase (5–10 mU) is incubated with 25 mM Tris pH 7.5, 0.02 mM EGTA, 0.66 mg/mL myelin basic protein, 10 mM magnesium acetate and [ $\gamma$ -<sup>33</sup>P-ATP] (specific activity approx. 500 cpm/pmol, concentration as required). The reaction is initiated by the addition of the Mg-ATP mix. After incubation for 40 min at room temperature, the reaction is stopped by the addition of 5 µL of a 3% phosphoric acid solution. 10 µL of the reaction is then spotted onto a P30 filtermat, and washed three times for 5 min in 75 mM phosphoric acid and once in methanol prior to drying and scintillation counting.
